# Supplementary material for: Nitrospina-Like Bacteria Are Potential Mercury Methylators in the Mesopelagic Zone in the East China Sea
Source: Front Microbiol. 2020 Jul 3;11:1369. doi: 10.3389/fmicb.2020.01369 (PMC7347909; doi:10.3389/fmicb.2020.01369)
Supplement: Supplementary file 2 [file Data_Sheet_1.FASTA]

>Thermodesulfovibrio_yellowstonii_DSM_11347_(NC_011296)
-----------------------MAITGIEIFKLLPKTNCKKCGFPTCLAFAMKVAQGQADIEQCPEASEEVKAKLKEAATP-----------------PIRGFVFGSKNTKIKIGEETVLFRHEKKFFNPTVLALEIKDT--ESNIDGFINEVLESSIERVGQILKVDAIFLKNESENSEIFNQVLDKIINKAFDLPLILGISKPEVAAKALEKLKESRPILSGATPENINEMSEIAKKYNVPLIISDKG-IEKVLKLVEIAHSVGVQDLVIDTQPNSAKELLMDNTLIRRASLKKGIRLLGYPIITFANR--DDNFYETVIASLAILKYSSIVVLSSIPKWK-------NLVLFTLKQNIYSDPQVPMQVKQDIYKVGEPDENSPIIVTTNFALTYFLVKG--------------------------------------------------------EIENSKVPAWLAIMDCDGLSVLTAWAAGKFSASKIAQFIKESGIEEKLNHKELIIPGYVAMLKGAVEDKLPGWKVIVGTKEASGIPAFLRNYVRSKK----------------------
>Syntrophobacter_fumaroxidans_MPOB_(NC_008554)
-----------------------MALTGIQIFKLLPKTNCGECGVPTCLAFAMNLASGKAELEKCPYVSEEAKETLASESAP-----------------PIRPLTIGTGDYAVKLGGETVMFRHEKTFVNPPGFAAVVGTDEDDASVSGKIERFRQCQFDRVGLKLRPELFAVRDAGGDAGKF-QGLAKKISDETGGSLILMSGNVDALKAAAGALKEKKPLIYAADASNVDALGALAKEVACPLAVKGDGSLESVIALTEKLSGMGIKDLVIDTGSRELKKVFEEQILIRRSALKNRFRPLGYPTMIVANEMAGDLMEETVIAAAFVAKYGALMVMSDFQPHS-------VFPLLLERLNIYTDPQRPMTAEQGIYPINNPDENSPVLVTCNFSLTYFIVSG--------------------------------------------------------EIESSRVPSWLCVQDTEGLSVMTAWAAGKFSGESVGTFINKCGIKDKVKHKSIIIPGYAAGISGELEEELGGWNVVVGPREASQISKFLRAFKPQ------------------------
>Desulfatibacillum_aliphaticivorans_(WP_028314286)
-----------------------MALTGIQIFKLLPKTNCKECGVPTCLAFAMNLASGKAELDQCPYVSDEAREQLAEASAP-----------------PIRPVKIGNGVRAFTVGGETVLYRHEKTFYNPTALGALVASDIADADLEKMLKEYNAFQYERVGLNLRPEYLAVKDVNGDAAAF-AKVAKTIAETSEFCVVLLTENADVMKAGAEACAAKRPLLCGANADNVDAMGALANDMGLPIGVKADG-AEALIALTDKLTGMGIKDIVIDSGAREIKKAFEDQVTIRRAALKSGNRSLGFPTITFPCEMADNLAVETMFAATFIAKYGGMVVLSELKGES-------IFPLLLERLNIFTDPQRPMIVTEGIYEINNPDENSPVLVTTNFALTYFIVSG--------------------------------------------------------EIEGSKVPCWLLIKDSEGLSVLTAWAAGKFAGDDVGMFVKKCGIMDKVKHQELIIPGYAAAIAGDVEEELPGWTITVGPREAAHIPGFLKNR---------------------------
>Kosmotoga_pacifica_(WP047755538)
----------------------------------------------------------------------------------------------------------MLKYIIVNTVETLLRGF-----PFPCKTGLIKIGNP-DRNSPVFATCNYHLTVERVKRSLK-------------------------GMNAYLLVANSRGINVWCAATGGLFTNHDVISILKTSGVEELVDHR--KVILPQLAATG-----IESRNIQKKTGWKVIWGPVYAKDIPTFME-NKLKKTSEMREVKFSWTQRIEIAAMWAFPFSAIA-------ALLMIFLWR---------------------------------EAIIPVITLLWGLPFLIFLSFPL-YSK--WLNPKRKRMSFSRYTLIFDFSR--IPLILWGFFMLFLIGYSILVGYSSLGFILRWGVLSLIVVIIVSFDLMGSTPVYKS-------GLHEDRLLKVTLDEKKCKGAGFCEQVCPRNCYEMDRNRHIATMPSAEQCVQCGACIVQCPFDALYFESPKGEIIPPEDIRKFKLNFIGKRLVKV
>Methanococcoides_methylutens_(WP048193041)
---------------------------------------------------------------------------------------------------------MNLHYLIIYIIETLLRVF-----PFPCQTGLIKIGDP-DINSPVILTCNYHLTVEGVKRAIK-------------------------GIDVYLLVANSKGINVWCSATGGRFTNHDVISVLKTSGIEEVVGHR--NVILPQLAATG-----VEAKIIKEKTGWEVIWGPVYAKDLPLFLK-DHFIKTPKMREVEFPWKQRIEMAVAWAFPISAVL-------AIIMIIFRS---------------------------------EAILPVVFLVWIISFLIFISFPV-YSR--FLKTEGKKIGF----IFFDFGRGSLQLIIWTILMVALAIYVVLSGNFSWRFILFWGFISFIVVLILSIDLMGSTPVYKG-------GFQDDRLLKVILDKDKCKGVGFCEEICPRNCFEVDRKRHIATMPRADQCVQCGACIVQCPLNALYFKSPNGEIIPPETIRKFKLNLMGKRFVKV
>Pyrococcus_furiosus_DSM3638_(NC003413)
----------------------------------------------------------------------------------------------------------MLRYILVNVVGTLLRAF-----PMPCRTGLVKIGNP-DENSPVFLTGNYCVTVERVRRVLERE-----------------------GIDCYLLVANSRDINVWCSAAGGHFTNHDVVSALKTSEIEKLVRHR--NVILPQLAAVG-----IEARKVREKTGWNVIWGPVYARDIPEFLR-NGYKKTPKMRRVEFPLTQRVEMATMWAFPFSLIA-------AFMAFFLWR---------------------------------SALIPLFLLSWLLPYAIFVSFPL-YSR--FLDSKKRGPGVSRYTVIFDFGK--IPLIFKAAFILLLVAYGALTGGLNLEFVLRWGFASLLIILMISIDLMGSTPVYKS-------GLHEERLLRVALDGERCTGCGVCVDVCPRACYEVDGENHTVMMPRADKCVQCGACIVQCPFEALRFEAPDGRAIPPEIVRRFKLNLMGKRLVRV
>Nitrospina_(WP017952925)
-----------------------------------------------------------------------------------------------------------MINWIKDIYQTLFRFA-----RFPCEPETVTIGNP-DKSSPVLVTCNFDYTVRHLKEYLKKE-----------------------ALDCFLLVVNTKGTNVWCAAAEGVFTTDIVLSHLKVYNVGELVNHK--RLILPQLSVAG-----VKRKELKEHG-WEGIYGPVYFTDLKEFLN-NGLTKNKDMQALEYGYWERFKMGLSHAVFCTLVC-------IIPIFLFAS---------------------------------DWWIQGIGLVWYFAFSMQLIEHF-IPFERLLYKG--------------------------------------------------------LALSLPILVLTLTSITDP-------VLKTQATLGVIALGGYIG-------------YDAQGHSHLGQNQKSGTIFAGMFAFLALVYGGTLFL---------------------------
>Marine_benthic_group_B_archaeon_SG881_(KON27549)
DFIISTFVLSELTPFKQLLFLKQIYNLLSPKGQFFIAAEIILKNRTSKLFYKLKQSLFNQINIFREGYTTYPVLDFNEKLENWFYSNLLLERRNIQLYTGTKKDIEDRISSLPTLESQLGRFRWIKVLYCILNPGLYIVGNP-NERSPLLVTSNYYWTVSAVSNALKNSQ-----------------------IDCYVLITDTNGINVWCAAGGGYFTHQSIIDALRLFDVDKYLTHK--DIIIPQLAATG-----VDRKEITKFN-WEPKFGPININEIQKYLV--KGQKFPSQSKIGFNIVTRTIMGAQHTIFLSIAY-----FLPILLLSGILGVLG---------------------LDQSFFWFNIIFQGSIIGVILSQVFAWIYPIFNYTRSFFIKG--------------------------------------------------------LIFGMISSTGIILILINLQTP-----FNISTIFFWFLLILLISLLVSLDFAGHTPYSNHLEVEADLVLFLFPAILIIASLIVILLLFPPVELLF-------------------------
>Desulfitobacterium_metallireducens_DSM15288(EHC09800)
------------------------------MEILS--------------------------------------REIK------------------------VTKTSTELTFQDILGAWKVRWG-INRMDYRVEPGLYSVGNP-NPNSPIMVSANYKLSFDMLRKDLKGL-------------------------DVWILVIDTKGVNVWCAAGKGAFGTQELLNRIAIVQLGKVVSHR--TLILPQLGAPG-----ISAHEVTKHSGFKIIYGPVKAKDISAFIN-SGMKATVEMRAVTFHTYDRLVLTPVELVNSLKV------SLMIFGILFLLDLLG---------------------IGPFG--FVDFYAYMGAVIIGCVVTPVLLPW-IPGRAFAWKG--------------------------------------------------------WLLGLIWAVLVNGLNGWPN----LPQYSILRALGYLLILPPIAAYYAMNFTGSSTFTSFSGVLKEMKIALPAIIISISLGIVLVLVNSFITL---------------------------
>Desulfosporosinus_acidiphilus_SJ4_(AFM40623)
-----------------------------MLEISSS-------------------------------------REIK------------------------ITQTSSELMMRDILGSWKARWG-INRMNYKVEPGLYSIGKP-DKSSPVFVSANYKMSFDSLRKELSGF-------------------------DAYIMVIDTKGINVWCAAGKGTFGTTEIINRIAIVQLDKVVSHR--NIILPQLGAPG-----VVGHEVLKYSGFRVIYGPVRAKDIKDFMN-AGMKAASEMRRVKFSAYDRLVLTPVELVNTIKP------SLMIFGVLFLLNLIG---------------------IGPFG--FVDFYGYLGSLIVGCVLTPVLLPW-IPGRAFAWKG--------------------------------------------------------WLLGLIWAVIVNLLNGWPY----APQYGLLKALGYLLILPSLSAYLAMNFTGSSTYTSFSGVLKEMKTAIPAIIISVVLGVILILVNSFI-----------------------------
>Desulfitobacterium_dehalogenans_ATCC51507_(AFM01083)
-----------------------------MLSIETN-------------------------------------REIK------------------------IMQTSTQLTFHDRLGSWKARWG-INRMNYKVEAGLYRVGDP-NENSPVLVTANYKMSFDSLRKELSGL-------------------------DTWILVLDTKGINVWCAAGKGTFGTTELLNRLAIVQLDRVISHR--TLILPQLGAPG-----VSAHEITKYSGFKVIYGPVRAKDLKEFIQ-AGMKATPEMRKVRFSAYDRLVLTPIELVGTLKA------SLMIFGILFLLNLMG---------------------LGPFG--LVDFYGYMGAVIIGCVLTPVLLPW-IPGRAFAWKG--------------------------------------------------------WLLGLVWTVFVNATNGWPY----DPQYSMLQALGYVLVFPAVSAYLAMNFTGSSTYTSFSGVLKEMRIAIPAIIVSIFIGCVLILVNSFI-----------------------------
>Desulfosporosinus_youngiae_DSM17734_(EHQ91195)
------------------------------MQISS--------------------------------------RELN------------------------ITPTSAQLTFSDILGTWKARWG-IGRMKYMVEPGLYSLGKP-DSNSPVLVSANYKMSFDKLRKELKGI-------------------------DAWILVLDTKGINVWCAAGKGTFGTQELLNRMAIVQLEKVVSHR--TVIVPQLGAPG-----ISAHVVAKFSGFKVVYGPVRAEDIKQFIK-SGMKATQEMRTVRFGIYDRLVLTPVELVGTFKI------SLMIFGVLFLLNLLG---------------------LGPFG--LVDFYAYMGAVVAGCVLTPVLLPW-IPGRAFAWKG--------------------------------------------------------WVLGFIWAIIVNILNDWNG-TG-ASEYSSLRALGYLFLLPSISAFLAMNFTGSSTFTSFSGVLKEMRKAVPAIIISTVLGMVLILVNSFMKL---------------------------
>Ethanoligenens_harbinense_YUAN3_(ADU26528)
------MESIVDETTAECSCSSGCCG---SAPIPNAP----------------------------------YIAGLNETLVG------------------AVPRVSTELSLRDILGAWQVRWG-FGRMSYKVVPGLYSVGKP-AENSPVLVTANYKLTFDSLRKELAGL-------------------------SLWILVLDTNGVNVWCAAGKGTFGTDELVRRIEAAGLEKVIKHR--TLILPQLGATG-----VAAYEVAKKSGFHVRYGPVRAHDIKAFLD-NEMKVTPEMREVRFTMRNRAVLTPVDLIRWVKP------LAIFFGILFILNTFG---------------------LGNFG--WTELVAFFGAVVTGCVLTPVLLPW-IPGRAFAFKG--------------------------------------------------------ALLGLIWTVVVLLLCGGLP------QLGIIRTLSFILLLPAVSAYTAMNFTGSSTYTSPSGVNKEMRVAIPAMLVSSILGIILLVVSLVVSGLVETIL---------------------
>Dethiobacter_alkaliphilus_AHT1_(EEG75985)
------------------------------------------MEKNKPCCAPKCCDTAQSFESQNSNFPSWVVDEIDTPIGK-------------------IPRIKTQTDFSDALGALKVRLG-INRDNYKVPPGLYAVGDP-TENSPVLATANYKLTFDGLRKELPGQ-------------------------NLWIIVLDTRGINVWCAAGKGTFGTAELIRRIELARLEKVVSHK--NIILPQLGAPG-----VAAHEVRKNTGFKVSYGPVYAKDLPAFLQ-NG-QATTAMRKVHFTLVDRLIVIPVELNYIFKV------VPALFILLLLFNLVSPG---------------EVDFLSSFMQSVSNLVPYVIAIVLGTVGIAALLPY-IPFRSFAAKG--------------------------------------------------------LLLGLAWSAFTVRHYALFNFP-----ENSLVAAANILFLTALTSFFALNFTGSTTYTSVSGVQKETLYTIPLLAVGTLIGLGLAIAYKIMLFRG-------------------------
>Desulfococcus_multivorans_DSM2059_(EPR42565)
-----------------------------------------------------------------------ME----TSAGP-------------------VPRVETAVSLRDKLGTVKTRLG-IGRYNYKVVPGLYCVGTP-GPESPVLMTANYKLTFDALRKELGGL-------------------------DAWILAADTRGINVWCAAGKGLFSTEEVVRRVNRSRLAEIVSHR--ELILPQLSATG-----IAAHQVKKICGFKVIYGPIRAADIPAFIQ-AGKTADQAMRTVTFTFRERAVLTPVEILLLRKA------LAVVIIATLFLSGFGP---------------GIFSMDAALSRGIPAVCATLFGILAGAVIVPFLLPH-FPWREFWISG--------------------------------------------------------ALAGIVAGVANTWLFNGRLDA-------WE-SLSLMLWTGAVGSYLAMNFTGSTPYTSPSGVEKEMRRAIPAQVAAGLIAVAVWFAAPFFG----------------------------
>Desulfobulbus_propionicus_DSM2032_(ADW16620)
-----------------------------------------------------------------------MTGFIDTPAGP-------------------VPQVTTTRSSRDLWGTIGARIG-IIRRNYKVAPGLYAVGSP-GNQSAVLVSANYKLSFDALRHQLGGL-------------------------DAWLLVVDTRGINVWCAAGKGTFSTWEVIDCVQRYRLNEVVAHR--ELILPQLAAPG-----VSAQAVRKGCGFTVLFGPVRAADLPAYLG-QGNRCDEAMREVTFPLADRAVLIPVELFLLAKP------LLAMLILGFLLSGISP---------------TIFSLTAALERGEALLAATGLGMLGGAVLTPMLLPW-LPGRQFWLKG--------------------------------------------------------VWAGLPAALGAWLLLAARLAA-------VE-QVALISWVLSLSSYLAMNFTGSTPFTSPSGVEYEMRRGLPVQLAATCLALVLWLASPFLH----------------------------
>Desulfonatronospira_thiodismutans_ASO31_(EFI33704)
-----------------------------------------------------------------------MS----TPAGL-------------------VPRVSPRLSLQDRIKAALARLG-PGRDHYRMAPGLYALGDP-DGQSPVLVTCNYKLTFDILRRELAGL-------------------------SCWLLVVETYGINVWCAAGKQSFNAGEVARQVKNAGLEQVVNHR--TLVLPQLAAPG-----VAGHKIRGLCGFKALFGPVEIRDLPYYLD-NKMQAADDLRRIKFPLGQRLLVALVEVYGARRF------MLWALLACMLLAALGP---------------GGFSLQGTALSGLGAWAVVWTGFIGGVFLVPVFLRQ-LYFRAFAAKG--------------------------------------------------------LLAGALTGFVLAVAVPG--GF-------LQ-GLAATAACMAFTSWFAMHYTGSTTFTSLSGVDREMRRYMPVQGALILVAVGLWLGSGWLG-PLAGGA---------------------
>Desulfomicrobium_baculatum_DSM4028_(ACU88503)
-----------------------------------------------------------MDDLAGYRIEPYVDGFLPTAAGR-------------------IPRVRTSPTAWDRLGTCRARLG-LDRNNYTVNPGLYAIGQP-GPEAPVIVTANYKLTFDTVRFTLPGR-------------------------DLWLLVTDTRGINIWCAGGKGTFNAAGIAEQVRKTGLERIVSHR--RLILPQLGANG-----VRVRDLRKACGFEAVFGPVRAEDLPRYLD-RGEDEA--MREVTFSLKERAAVIPVELVLGWKI------ILASFLVAAVLSLIGP----------------DFSVQAIRQRWILAACATGFGLAAGAILFPLLLPV-LRTRLFSLGG--------------------------------------------------------AGLGLALSVLLPAIFPQ-LSW-------AA-VTGAGLWTMSLASWLALNFTGSTPYTSPSGVEKEMRKAIPVLAGGTLLAAILFVTGNFL-----------------------------
>Desulfovibrio_africanus_str._Walvis_Bay_(EGJ48477)
--------------------------------------------------------------------------------------------------------MATHLSAADRLGGVGVRWG-IGRGRYRVIPGLYAVGSP-DAQSPVIVTANYKLTFDALRKELSGL-------------------------NAWLLVLDTKGVNVWCAAGKKTFSAEEIVRRVRACGLERLVAHR--TLVLPQLAAPG-----VAAREVRRGCGFKAVFGPVCASDLKAFIA-ADMQASPEMRRVSFGLWDRLAVAPVEIHNARRK------ALYAALILLFLAGLGP---------------GVWSLGRMLDRWPAAFGSLVLGFFGGAFIMPALLPW-LPFRAFALKG--------------------------------------------------------GLAGLAMGTLAAALFAGGLGW-------LD-GLAMILAATVVGSWYGLNYTGSSTFTSPSGVERELRRYMPAQAVLTLAALVAWLVSPFAA----------------------------
>Desulfovibrio_sp._X2_(EPR42826)
-----------------------------------------------------------------MRAWPFVEGWIETPAGP-------------------VPRVRSAWRGRDRLGALAVRLG-IGRDSYRIAPGLYALGAA-TPESPVLVTSNYKLTFDTLRRALPGR-------------------------ACWILVVETYGINVWCAAGKRTFSTEEVADRVRAAKLEQVVSHR--RLVLPQLCAPG-----VAAHRLRRLCGFSGVFGPVRAEDLPAFLD-AGMTAGEALREVRFPLAERLAVSFVEIRANRRL------TLAVALCCLVLAALGP---------------GGFTVSGTLRAALGGFAVFAAAFAAGVFLVPALLAR-IPVRAFAAKG--------------------------------------------------------LVAGGAVGLALASVLAH--GL-------PD-GLAAVCAAMAFASWFAMNYTGSTPFTSLSGVDREMRRYMPLQAGLLLAAVLLWLVPCWFS-IGSGGA---------------------
>Desulfovibrio_desulfuricans_ND132_(EGB14269)
-----------------------------------------------------------------------MDGFARTAAGP-------------------VPRVRTYLRRDDRVGDLRARLG-TNRHDFKVVPGLYCVGEP-DRTSPVLVTANYKLTFDTLRERLTSI-------------------------DAWLLVVDTRGINVWCAAGKGLFTASEVAFSVNAVRLHQVVEHR--ELILPQLAATG-----VAAREVERICGFKVLWGPIRARDLPAFLR-NGNKADEAMRGVTFTLRERAALIPVELYQLRKP------LFAAIPLLFLLSALGP---------------DLFSPPALWQRGISAVTATLVGALAGSVLVPLFLNR-LPWRQFWPKG--------------------------------------------------------ALVGGAAGTL-AALYLPVHGW-------AD-PLALTLWATAVASWQAMNFTGSTPYTSPSGVEKEMRRGMPLQALAALAAAGLWLAGPFLG----------------------------
>Desulfovibrio_alkalitolerans_DSM16529_(EPR31439)
-----------------------------------------------------------------------MSGWLQTPAGL-------------------VPRVRFDWAASDRLGALAVRMG-IGRDSYRIAPGLYALGEP-DAQSPVIVTCNYKLTFDILRRDLAGH-------------------------SCWLLVIETYGINVWCAAGKRSFSTAEVAARVRATGLERIVEHR--RLVLPQLAAPG-----VAARKLRGLCGFGAVFGPVRSRDLPAFLG-AGFTAEPSMRRAEFPLGERLTVALVEMHAARKF------MAWTLALCLVLAALGPAWK------------GGFSVMGLLAVGLGAFAMTLAGFVGGTFVTPALLRL-LPGRAFAAKG--------------------------------------------------------LLAGAAVGLPLAVLLAR--SV-------PE-GLAALSICAAFSSWFAMHYTGSTPFTSLSGVDREMRRYMPAQGLLAFLAVMLWLGWSWFGGPAAGGS---------------------
>Pseudodesulfovibrio_aespoeensis_Aspo2_(ADU63658)
-----------------------------------------------------------------------MD----TPVGP-------------------VPRVRTRLLARDRLQTATVRMG-YGRYDYKVVPGLYCVGTP-TSDSPVIVTGNYKLTFDAVRRELSDL-------------------------DAWLLVADTRGINIWCAAGKDLFSTDEVAYSVTRTRLAEVVAHR--RLILPQLGATG-----VAGHAVRRQCGFSVLWGPVRAADLPAFIQ-SGNTPDEAMRTVTFTLRERAELIPVELFILGKP------LGLTLLAAFLLSGIGP---------------GIFSPGAAWARGLAAACATLAGIAAGGVAVPLLLPR-LPWQSFAPKG--------------------------------------------------------ALVGVATGALNALLFAQTLGL-------LE-SAALILWTTATASYLAMNFTGSTPYTSPTGVELEMRRAIPIQAGAALCALILWIAAPLI-----------------------------
>Geobacter_sulfurreducens_PCA_(AAR34814)
-----------------------------------------------------------------------------------------------------MPVISTQLAMRDTLGAWQARWG-IGRMSYLVPPGLYAIGAP-GPGTPVVVTANYKMSYDSVRWELAGR-------------------------DIWLLVLETHGINVWCAAGKGTFGTDEIVKRVGLTSLSRIVNHR--TLLLPMLGAPG-----VAAHLVRQRTGFKVRYATIRAADLPAYLD-NGMIATSAMRQLTFTTVERLVLTPIELVAACKWG-----LPVMALIVLAAGFSDGA--------------------FSPERAVPAAIAWGATIATGAVGAPLLLPW-LPGRSFAVKG--------------------------------------------------------ASLGLLLAALLVWSGRGMVS--------LHEVAALFFITPAVCSFLALTFTGSTPFTSRSGVKKEMRVALPVMTAALVAGLTSWLFGSFLLS---------------------------
>Geobacter_metallireducens_GS15_(ABB31476)
-----------------------------------------------------------------------------------------------------MPIVSTEFRFADRLGAWKARWG-IGRMSYLVPPGLYAIGSP-GPEDPVVVTANYKMSYDLVRRELSGR-------------------------NVWFLVLETFGINVWCAAGKGTFGTDELVRRVGMVKLATVVKHR--ALILPILGAPG-----VAAHQVARRSGFRVHYATIRAADLPEYLD-NGMVTTPEMRQLTFTTRERLALTPIELVTTGKWV-----VPFVALLVVLSIVPGGL--------------------LSSPTLVSSLVLFVGTVLAGAVAAPVLLPW-LPGKSFAVKG--------------------------------------------------------AVAGCCWAVLFIGVGRGATG--------WLDAMALFLTVPAVTAFLTLNFTGSTPFTSRSGVKKEMRLGLPMMAVSLLAGISLWIAARFF-----------------------------
>Geobacter_bemidjiensis_Bem_(ACH38202)
-----------------------------------------------------------------------------------------------------MPQLSTSLTAADRLGACKARWG-INRMHYLVPAGLYAIGAP-DAEAPVVVTANYKMSFDLVRKALAGR-------------------------NVWLLVLETFGINVWCAAGKGTFGTDELVRRVAATALSGVVSHR--RLILPILGAPG-----VSAHQVKRRSGFDVAYAAIRADDLPEYLD-NGGRTTASMRELSFNWYERLVLVPVELVLVLKPS-----LPVALFLYLAAWLAAGP--------------------GAA---ATVVAGYAGAVFTGVAAAPVLLPL-LPSRSFAVKG--------------------------------------------------------GAAGLVYTLLFRLAAGGEGWS-------LPVTLAAFLAFPAVTSFYTLNFTGCTTYTSKSGVKKEMRLGLPVLGGAILAALLLVTVGRMLS----------------------------
>Geobacter_daltonii_FRC32_(ACM20836)
-----------------------------------------------------------------------------------------------------MPQISSDLRFDDLIGRWKARWG-IGRMSYLVPPGLYAIGRP-TGSDQVVVTANYKMSFDIVRNELAGR-------------------------NVWLLVLETHGINVWCAAGKGTFGTEELVHRLEATGLARIVTHR--RLLLPILGAPG-----VAAHQVAQRTGFSIVYATIRASDLPRFLD-NGQVTTPDMGKLTFSLYERLVLVPVEVMHSLVPT-----AVIILCLFLCGTLFGGA--------------------TSG---LQAAIAYLGATLAGLVATPLLLPW-LPGKSFSIKG--------------------------------------------------------TVTGVLWCILWYFAGNGATWG-------LPATIGAFLALPAVSAFYALNFTGCSTYTSRTGVKREMRRALPLMGGAVALGVLLFVAGKICVIC--------------------------
>Methanomethylovorans_hollandica_DSM15978_(AGB48887)
-------------------------------------------------MTSEKNSSASCSCAPRSDKNQFITLTSKMQASE-------------------ILTTTSGLTLKNRLDHVFARLG-VNRTGHTVKPGLYKLGNP-TSESLVFASANYTLSFDAVR--LQVL-------------------------TGYILVLDTKGINVWCAAGKGTFGTDELVKRIMWSGLSNIVRHR--TVIVPQLGAPG-----ISAHEVQNRSGFKVEFGPVRASDLPEYLK-T-HKATPEMRRVHFALKDRLVLTPVELRHAIV------PTIAAAIILYLLAGP------------------------------LAALAAITTVITGTVLFPALLPL-IPTHDFSTKG--------------------------------------------------------LILG-LLVAIPFTISFAANPVMPLLTKAI-ISLALIVTMPATTAYLALNFTGCTTFTSRTGVKKEIYRYVPIIALLAGCGILLLMILGAMRFMELV-----------------------
>Methanospirillum_hungatei_JF1_(ABD40626)
----------------------------------------------------METS-CCCSCS----EPDTACSY------S-------------------IPQTDSNITIANRIDHILARWG-YKRSGHVVRPGLYRLGNP-DADSPVFASANYTISFDTLRLNLKGF-------------------------DAYILVLDTKGINVWCAAGKGTFGTDELVKRIESTGLSHIVSHR--NIIVPQLGAPG-----ISAHMVKQRSGFTVEYGPVRAADLPEYMR-T-GKATSEMRKVSFPIQDRLVLIPIELVHVAI------PTIIISIILWLLAGP------------------------------AAGVAAIAAVITGTVLFPILLPY-LPTQDFSMKG--------------------------------------------------------FILG-GVCAVPFSAMYAQSADLPEWALAA-GAIVPLLIIPAVVAYLGLNFTGSTPYTSRTGVKKEIFRYVPIMAVMTGIGSVIGIVLSIFRLAGVI-----------------------
>Acetonema_longum_DSM_6540_(EGO62461)
MEKGPAAGGCSCSCGETQNSETHCCNQRPMANISEKPM-------------------------------PWIIGEIETSIGK-------------------IPQVSTEYASSDRFGSWKARWG-IGRIDYKIPPGLYGVGNP-DADSLVLVSANYKMSFDRLRSELKGL-------------------------NLWILVLDTKGINVWCAAGKGTFGTDELVNRINQVKLPEIVTHR--TLVVPQLGAPG-----VSVHTVLKLSGFKVVYGPVRAADIPAFIS-AGLKATAAMREVRFDMFDRLVLAPFELVSTIKP------ALILIAVLFLVNLTAGKEGVD---------------LRVVSHTLADFIPFLGAILTGTVLVPLFLPY-IPGPAFAWKG--------------------------------------------------------WLLGLLWAGAYVWYIAS--------PLSGIHELFYFLILPPIASYLAMNFTGCSTYTSLSGVAKEMNFAIPAQIISAVGGIAL---LAGGLFLGF------------------------
>Syntrophus_aciditrophicus_SB_(ABC78804)
---------------------MMKDSEKPGKSDMSEQRKPVMIFPMIQPGFTAGRMGREVPLNLPAITQSFVVDTLSTAVGM-------------------VPVVDSRLTRQDHVGSLKARFG-IGRMNYRVDPGLYALGRP-DESAPVLVSANYKLSFDCLREALPGR-------------------------TAWILVLDTNGINVWCAAGKGAFGTEEVVRRLRSSGLEKLVKHR--RLILPQLGASG-----VAAHEVRKQTGFAVSYGPVEARDLPAYLD-AGMKATEAMRRKNFPFRDRLVLIPMECLPALKPL-----FLLTLFFLIAGGIVQGPR---------------WTVEPTLNSGIFMTFALLGAFFAGTIFTPAFLPW-LPGRAFSAKG--------------------------------------------------------LCPAWIVVLILLESRLT-FP---LSLPRVLESFSVLFLVPAAASYWAMKFTGSTPITSLSGVRKEMRRALPLQIAGALIGLGCWAAAKLLRVL--------------------------
>Acetivibrio_cellulolyticus_CD2_DSM1870_(2510774674)
------MEDKRCCNSNKINSKNKVAGNKPKIRVSSQSSSLPYTAEKGSCCCGGSDQAEAEPITQYDKKDNWITGEIKTPRGK-------------------VPIVSTQLAFSDRLGGWKARWG-INRMNYKINPGLYAVGIP-DNTSPVLVTANYKLTFDALRKELADI-------------------------NAWILVLDTRGINVWCAAGKGTFGTREIVTRINKTRLHEIVSHR--TLILPQLGAPG-----VSAHEVSTKIGFKVVYGPVRASDIKEFIT-LGMKATPEMRTVKFNTYDRLVLTPMELVNTFKI------CLMVLGLLFILNLIA---------------------VRSFG--VIDLYAYMGAILAGTVLTPVLLPW-IPGRAFAWKG--------------------------------------------------------WFLGFIWAITVNILNGWPF----SPSYSLIRLLGYLLILPSISSFYAMNFTGSSTYTSLSGVLKEMKIAIPIIIITISSGVLLILIDSFIKL---------------------------
>Ruminiclostridium_cellobioparum_subsp._termitidis_CT1112_(EMS71460)
---MENKSCCTSGNARLNTGDRKSVKIRPRLKAANKNCTGVSGQKDNTCCCGGSDNCSSEPVTNYDRNIPWITGEIETAAG-------------------KIPQVATRLLRSDILGAWKVRWG-IGRMNYKINPGVYAVGIP-DRASPVLVTANYKLTFDALRKELSGM-------------------------NVWILVLDTKGINVWCAAGKGTFGTRELVNRISRARLREIVEHK--TLILPQLGAPG-----VSAHEVTKQTGFKVVYGTVRAKDIRSFIN-SEMKATEEMRQVRFTVYDRLVLTPMELVGTFKI------SMLIFGILFLINLVA---------------------RKPFG--VMDFCAYAGAVAAGCVITPILLPW-IPGRAFAWKG--------------------------------------------------------WQAGLLWAIALNFLNGWIG----PEGLSLLRGVGYLLVLPSISAYYAMNFTGSSTYTSFSGVLKEMRLAIPAIILSLIPGIGLLLADSLIRF---------------------------
>Bacteria_ferrireducans_S3R1_(2517272092)
-------MTETDPCCSPAPPGDSLPMAEACCPPPGSTALAMAEPCCGSAAEAVGPRWADR-ERPGYRIWPFVDEWIETPVGD-------------------VPVVSTRLGKGDVLGRWAMRWG-IGRDRYRIAPGLYAVGRP-TPDSPVVVTANYKMTFDLVRKDLGGV-------------------------NAWILVLETWGINVWCAAGKGTFGTDELVARVRKAGLDRVVSHR--TLVVPQLGATG-----VAAHEVRRRCGFRVVYGPVRSRDLAAFLR-AGMKASPNMRRVTFSLWERLVLTPVELRVILMRP-----SLALAALLLVLGGIGP---------------GGYSLAGALVRGGAAVGTLAAGVLAGAVAAPVLLPW-LPGRMFAVKG--------------------------------------------------------VWTGLGAALVLAARFGTRLNG-------WG-LMALVLAVTAASSYCAMNFTGSTPFTSPSGVEAEMRRALPWQIGAAGLALVAWMVSAWSL----------------------------
>Dehalobacter_restrictus_DSM9455_(2510121322)
----------MGEISFDPNQNNQNANNKAELKIFDPQSCCCGDDSLAG------------SVTVYDTECGWITGEIKTPAG-------------------LVPQISTNLTALDILGGWKARWG-INRMNYKINPGLYAVGNP-DEHSEVLVTANYKMTFDALRKELAGL-------------------------QAWILVLDTKGINVWCAAGKGTFGTAELSSRIGKTRLSQIVSHR--TLLLPQLGAPG-----VSAHQVHKQTGFNVVYGPVRAWDIREFVA-SGRKATAEMRTVKFTAYDRLVLTPMELTGTFKM------SLMILGILFILNLIR---------------------PGAFG--ITDFYAYAGALIVGCVLTPVLLPW-IPGKAFAWKG--------------------------------------------------------WLLGLLWAAAVNVLNGWPG----ELSYSWLRALGYLLVLPSISAFYAMNFTGASTYTSFSGVMKEMKTAVPTIVVTIGVGVTLILLNALFRM---------------------------
>Dehalobacter_sp._11DCA_(2520954802)
----------MGEISFDPNQNNRNANNKAELKIFDPQPCCCGDDSLAG------------SVTIYDTECGWITGELKTPVG-------------------LVPQISTNLTTQDILGGWKARWG-IGRMNYKINPGLYAVGNP-DEHSEVLVTANYKMTFDALRKELAGL-------------------------QAWILVLDTKGINVWCAAGKGTFGTAELSSRIGKTRLAQIVSHR--TLLLPQLGAPG-----VSAHQVHKQTGFNVVYGPVRAWDIREFVA-SGRKATAEMRTVKFTACDRLVLTPMELTGTFKM------SLMILGILFILNLIR---------------------PGAFG--ITDFYAYTGALIVGCILTPVLLPW-IPGKAFAWKG--------------------------------------------------------WLLGLLWAAAVNVLNGWPG----ELSYSWFRALGYLLVLPSISAFYAMNFTGSSTYTSFSGVMKEMKTAVPVIAVTICIGCILILLSSLFGL---------------------------
>Dehalobacter_sp._(2520069246)
----------MGEISFDPNQNNQNANKKVELKMFAPQPCCCGDDSLAG------------SVTVYDTECGWITGEIKTPAG-------------------LVPQISTNLTALDILGGWKARWG-INRMNYKINPGLYAVGNP-DEHSEVLVTANYRMTFDALRKELAGL-------------------------QAWILVLDTKGINVWCAAGKGTFGTAELSSRIGKTRLSQIVSHR--TLLLPQLGAPG-----VSAHQVHKQTGFNVVYGPVRAWDIREFVA-SGRKATAEMRTVKFTAYDRLVLTPMELTGTFKM------SLMILGILFILNLIR---------------------PGAFG--ITDFYAYAGALIVGCVLTPVLLPW-IPGKAFAWKG--------------------------------------------------------WLLGLLWAAAVNVLNGWPG----ELSYSWFRALGYLLVLPSISAFYAMNFTGSSTYTSFSGVMKEMKTAVPVIAVTICIGCILILLSSLFGL---------------------------
>Dehalococcoides_mccartyi_DCMB5_(AGG05961)
----------------------------------------------------------------------MLQGKVGSPAVT-------------------VHQVATHLDMADRLGAIKVRLG-LRRMHYAVEPGLYAIGSP-TAESPVFVSANYKLSFDHLRQELEG-------------------------IDGWIMVIDTKGINVWCAAGKGTFGTEEIVHRIEITRLSEIVSHR--WIIVPQLGAPG-----VASHEVRRRSSFHVIYGPVRARDIRKFLD-AGMKTSPNMRRVNFNIGDRLVLVPMELIQWGRY------AFFAAVVLFLLTGLSRNGY---------------VFSGLAGG--REVALLFLAFVAGGALVPIFLPW-LPGRALSWKG--------------------------------------------------------MTIGLLLAAVLVVVGLIPSGGIA----GRLEIVAWVLLMPAIGAFMAMNFTGATTYTSLSGVKKEMRFAVPSQIVAAVLGFALWITARFF-----------------------------
>Delta_proteobacterium_MLMS1_(639154017)
----------------------------------------------------------------------------------------------------------------------MVRCG-LGRMNYLVEPGLYALGSP-GPESPVLVSANYKLSFDHLRRALPGL-------------------------AAWILVLDTDGINVWCAAGKGSFGTANLVRLLQVSRLAGLVNHR--QLIVPQLAAPG-----VNARLVGQESGFQVRFGPVEAAELPAYLA-AGGQATAAMRRKYFPWRERAVLIPVELVQKLPWL-----LPLWLLLGLIG-WLAGPP---------------WS---TLAG--LAAVALLLGVLAGQVLTPLLLPW-LPGRAFAVKG--------------------------------------------------------LGAGLLAALALPVSLAMGFPDANLALP-TLDFLAWPLLIGALASYLALEFTGASTYTSLSGVKKEVRLAWPLQLAGGALAVLLLLAGRLPGGGGG------------------------
>Delta_proteobacterium_NaphS2_(EFK05849)
-------------------------------------------------------------MSRPGLDQPFVKGTVETKAGK-------------------VPVISSQLEWTDRWGTFKARWG-VNRMDYKVDPGLYALGKP-DEKAMVFVTANYKMSFDRLRESLTVR-------------------------NVWILVLDTNGINVWCAAGKGTFGTEELVRRIAASGLEQIVSHR--ELILPQLSGPG-----VAAHLVKKQSGFKVIYGPILSADLTRFLD-GGRKATPAMRKKSFSTRERTVLVPVELVGTLKWS-----LVVLPCLFLAA-GVAGAE---------------GFWESALRYGLFAVIAYICGIFSGAVLTPILLPW-LPGRAFSFKG--------------------------------------------------------LIMGIITAIVVAVFWPGNFE----TWAGRAEIFAWFFLIPSISAFLAMNFTGASTYTSLSGVRKEMEWAVPLEIFGVGVGLLLWILSLIAA----------------------------
>Desulfitobacterium_dichloroeliminans_LMG_P21439_(AGA68305)
-----------------------------MLSIDTK-------------------------------------KEIK------------------------ILQTSSQLTFADTLGAWKVRWG-IDRMNYKVEPGLYRVGNP-DGSSPVLVTANYKLTFDGLRKKLTGL-------------------------DTWILALDTKGVNVWCAAGKGTFGTTELINRLAIAQLDKVVAHR--TLILPQLGAPG-----VSAHEVTKYTGFRVIYGPVKAEDIKEFIQ-AGMKATPEMRTVQFGAYDRLILTPIELVGTLKK------SLMIFGVLFLLNLMG---------------------LGPFG--WVDFYGYIGAVIIGCVLTPALLPW-IPGRAFAWKG--------------------------------------------------------WLLGLVWAILVNGLNGWPY----EPRYSLLQALGYILIFPAVSGYLAMNFTGSSTYTSFSGVLKEMRIAIPTIIISIIVGCVLLLAGSFI-----------------------------
>Desulfitobacterium_sp._PCE1_DSM10344_(2512921981)
-----------------------------MLSIETN-------------------------------------REIK------------------------IMQTSTQLTFHDRLGSWKARWG-INRMNYKVEAGLYRVGDP-NENSPVLVTANYKMSFDSLRKELSGL-------------------------DTWILVLDTKGINVWCAAGKGTFGTTELLNRLAIVQLDRVISHR--TLILPQLGAPG-----VSAHEITKYSGFKVIYGPVRAKDLKEFIQ-AGMKATPEMRKVRFSAYDRLVLTPIELVGTLKA------SLMIFGILFLLNLMG---------------------LGPFG--LVDFYGYMGAVIIGCVLTPVLLPW-IPGRAFAWKG--------------------------------------------------------WLLGLVWTVFVNATNGWPY----DPQYSMLQALGYVLVFPAVSAYLAMNFTGSSTYTSFSGVLKEMRIAIPAIIVSIFIGCVLILVNSFI-----------------------------
>Desulfobulbus_japonicus_DSM_18378_(2525725204)
------------------------------------------------------------------------------------------------------------------------------------------VGTP-HRDSPVLVTANYKLSFDLLRFELAEV-------------------------DCWILVVDTRGINVWCAAGKGTFSTDEVVLMVKQTRIAELVSHN--TLIVPQLCAGG-----VSSSLVKKKSGFRIIFGPVQARDLPEFLE-RDNTASEGMRAVTFTLMERVELIPVELYLQLKT------IGFVLIAGFLFAWIGP---------------HMFSLQAIIQRTLHLGMATLLGLLCGSVFVPILLPW-LPCRQFWLKG--------------------------------------------------------LWPPLLVA-LCWGINIYPHVT-------IE-LLSLSVWMSVFSSFQAMNFTGCTPYTSPSGVEYEMRRGIPVLALLAILALLVWLVAPFVD----------------------------
>Desulfobulbus_mediterraneus_DSM13871_(2523916689)
--------------------------------------------------------------------------------------------------------VTTAPLWSDRLGTIGARLG-AIRNTYLVAPGIYGVGNP-QADSPLLVTANYKLSFDQLRFQLAGI-------------------------DAWILVIDTRGINVWCAAGKNTFSTAELVYSLDHYQLSRLLSRR--RLIVPQLSAPA-----LCAEEVRRQSGFRVIFGPVRAADLPRFLA-QGEVADEEMRTVTFSWQERAVLIPVEFFLVLKP------LAAILISCLLISGLGP---------------GFFSLEAVLSRGPLLLITTLAAICSGTVLVPLLLPW-LPGRQFWLKG--------------------------------------------------------LLPGLLSG-GLCWLFAAPLAV-------VE-GLALLFWSLSIASFLAMNFTGSTPFTSPSGVEYEMKRGLVVQFALTGLALTLWLLAPFL-----------------------------
>Desulfomonile_tiedjei_DSM6799_(AFM23739)
---------------------------------------------------------------------------MDTFAGK-------------------IPKVSSDLTFTDRFGTYKARWK-IGRMKFVVDPGLYALNDP-DAASPVLVTANYKMSFDSLRSALPGS-------------------------SAWLLVLDTQGINVWCAAGKGTFGTDELVNRIETSGLTKVVSHK--QLILPQLGAPG-----IAAHRVKKLSGFKVVYGPVDSSDLPEFIA-SGLEATPEMRTKTFTLRERAAVIPVELVSASTTA-----LYIIPVLLILS-AFGGPY---------------GYWTNITHYGLAASAGLVAAIIAGTVLFPLLLPW-LPGRAFSLKG--------------------------------------------------------FAIGIATSLVFIALKATITG----EWPNTLEAGAWILLITVVVSYLGMNFTGCSTYTSLSGVKKEMKWAVPFQIAGIVAGIALWVSSGFLA----------------------------
>Desulfonatronum_lacustre_Z7951_DSM10312_(2516164329)
-----------------------------------------------------------------------MDGFITTPPGR-------------------VPRVRTCPTLWDRLGDCRARLG-LDRNNYTVNPGLYAVGAP-SPDAPVVVTANYKLTFDTVRFALHGR-------------------------NAWLLVADTRGINVWCAGGKGSFNAEAVAVQVRKAGLDRVVSHR--RLILPQLAANG-----VRLRDVRKATGFEAVLGPIRAEDLPRFLD-QGPDEA--MREITFTFRERLAVVPVELVLGWKM------ILAVLAAAAVLGLIGT----------------EFAPGAVFQRWAVAATATLFGLLGGTVAFPLLLPR-LPTRLFSLAG--------------------------------------------------------AGLGLIPALALPLLFPT-PAW-------PV-LAGAGLWTMTLSAWTALNFTGSTPYTSPSGVEKEMRAAIPILAGSTVVSVICFIWGNLQ-----------------------------
>Desulfospira_joergensenii_DSM10085_(2523531012)
----------MDKTKQKKSEAPGPSGFSGRNLSILPSMPSQENSDLSCCGSGVREPALPGDQKPGYALCSHVEDFLPTHAGR-------------------VPIIKTRLNREDLFSTFYVRCG-IGRDDYRVAPGLYAVGKP-DRESEVLVTANFKLTFDHVRKNLKEV-------------------------DAWILVLDTWGVNVWCAAGKGTFSTGELVSRIETSCLDKVVDHR--RVIVPQLGATG-----VSARAVKKASGFRVVYGPIRARDIPRFLE-NRRKADPAMRRVTFPLYERFILTPVEIKIALKP------ALITAIVLILLSGIGP---------------GVFSFSGAWERGMAAIAALVTGILAGGFVTPVLLPY-LPFRAFAPKG--------------------------------------------------------IIIGSAASVLLLLMSTHETDS-------LSRILALFLFSTAVSSYLAMNFTGATPFTSPSGVEKEMKQFIPVQAGALAISLGLWIYSAF------------------------------
>Desulfosporosinus_orientis_DSM765_(AET68199)
-----------------------------MLDITMS-------------------------------------REIK------------------------ITPTSSQLTAQDIRGTWKARWG-IGRMNYKVEPGLYRLGNP-DPNAPVLVTANYKMTFDALRKELTDL-------------------------DAWILVLDTKGVNVWCAAGKGTFGTTELINRLAVVQLEKVVSHR--LLILPQLGAPG-----VSAHEVLKFSGFKVLYGPVRAKDIKEFIR-SGMKATGDMRKVKFNTYDRIVLTPVELVITFKK------SFVIFGVLFLLNLMG---------------------IGPFG--LVDFYSYLGAVIIGCVLTPVLLPW-IPGRAFAWKG--------------------------------------------------------WLLGFIWAVLVNFLNGWPA----APEYSLLRALGYMLILPSVSAYLAMNFTGSSTYTSFSGVLKEMKIAIPGIIISLVLGAVLILINSFI-----------------------------
>Desulfosporosinus_sp._OT_(EGW36302)
------------------------------MEIST--------------------------------------RELK------------------------IMPTSSKLTFNDVVGTWKARWG-INRMNYTVEPGLYSVGKP-NRNSPVLVSANYKMSFDSLRKELDGV-------------------------EAWILVLDTKGINVWCAAGKGTFGTQELLNRIAVVQLEKVVSHS--TVIVPQLGAPG-----ISAHVVAKFSGFKVVYGPVRARDLKEFIQ-LGMKATREMRTVKFTTYDRLVLTPVELVGTFKV------SLMIFGVLFLLNLLG---------------------LGPFG--LVDFYGYMGSVLVGCVLTPVLLPL-IPGRAFAWKG--------------------------------------------------------WMLGFIWAIIVNVLNGWNEWTA-VPQYSILKALGYILILPSVAAFLAMNFTGASTFTSFSGVLKEMRKAVPAIIISLVLGIILLLVNSFI-----------------------------
>Desulfotignum_balticum_DSM7044_(2526265153)
-----MKIRPMDTRSDNPTQDPFQKKGPGLSTNDVQLMPSMDMPGLLCASEETRP--MAAYDRPGYELCRYVDHFMETDAGP-------------------VPVIRPDLEKKDRLSTIAVRCG-IRRDKYLVSPGLYGIGSP-DPDSDVLVTANYKLTFDHLRSALRGV-------------------------SAWILVLDTRGVNVWCAAGKKIFSTQELVNRIKAVHLEKVVAHK--RVIVPQLGATG-----VSARQVKAQSGFRVVYGPVRACDIPEFLN-KGKKADKPMRQVTFTLFERFVLTPVELHGALKI------SGIAALMLFVLSGIGP---------------GIFSFHGAWERGLISLSALVTGLISGAVLTPVLLPV-IPSKKFAFKG--------------------------------------------------------ILMGGVCGLLLLPLIWDHIGS-------MAGAAALVIFSVMVSSHLAMNFTGATPFTSPSGVEKEMKQYIPVQVTGILVSAGLWIYSAF------------------------------
>Desulfotignum_phosphitoxidans_DSM13687_(EMS78346)
-----MKILPMAIRSDNSTQNPFQKKGPGLSTNNVQLMPSMNMPGLTCATEETRP--MAAYDRPGYELCRYVDHFMETDAGP-------------------VPVIRPDLDKKDRLSTIAVRCG-IRRDKYLVSPGLYGIGSP-DPDSDVLVTANYKLTFDHLRSALEGI-------------------------SAWILVLDTRGVNVWCAAGKKNFSTQELVNRIQAVSLEKVVAHK--RVIVPQLGATG-----VSARQVKARSGFRVVYGPVRACDIPEFLD-KGKKADKSMRQVTFTLFERFVLTPVELHGALKI------SGISALVLFVLSGIGP---------------GIFSFHGAWERGLVSLSALVIGLISGAVLTPVLLPF-IPSKKFAFKG--------------------------------------------------------ILMGGVCSLLLLPVIWDHIGS-------MAGAAALVIFSVMVSSHLAMNFTGATPFTSPSGVEKEMKQYIPVQVTGLMVSAGLWIYSAF------------------------------
>Desulfovibrio_africanus_PCS_(EMG37847)
--------------------------------------------------------------------------------------------------------MATHLSAADRLGGMGVRWG-IGRGRYRVIPGLYAVGSP-GAQSPVIVTANYKLTFDALRKELSGL-------------------------DAWLLVLDTKGVNVWCAAGKKTFSAEEIVRRVRACGLERLVAHR--TLVLPQLAAPG-----VAAREVRRGCGFKAVFGPVCARDLKAFIE-ADLQASPEMRRVSFGLWDRLAVAPVEIHNARRK------ALYAALILLVLAGLGP---------------GVWSVGRMLDRWPAAFGSLALGFFGGAFIMPALLPW-LPFRAFALKG--------------------------------------------------------GLAGLAMGTLAAALFAGGLGW-------LD-GLAMILAATAVGSWYGLNYTGSSTFTSPSGVERELRRYMPAQAVLTLAALVAWLVSPFAA----------------------------
>Desulfovibrio_inopinatus_DSM10711_(2525213991)
---------------------------------------------------------------------------------------------------------------------MFARLG--GRTNYKIVPGLYCVGTP-NAGSEVLVTCNYKLTVDALRHDIEGV-------------------------NAWILILDTHGINVWCAAGKKTFSTVEIIHRVAMSELKCIAPEA--TLILPQLAATG-----VNAREVRKKTGFPTIFGPILSKDIPQFLA-NNLQADTAMRRVTFNMSERAVLIPVEITLLWKP------IIIGLVLMLLVSGISP---------------SIFSFHAALTRGYAAFLAGVAGIVAGTVIVPLFLPW-LPGRAFSIKG--------------------------------------------------------ALTGFGTGTIAAFMG----DS-------FLAGSALVLFSTAISTYLAMNFTGSTPFTSPSGVEKEMRYALPWIAGGFVLSVLLWIISGLSA----------------------------
>Desulfovibrio_longus_DSM6739_(2523631744)
-------------------------------------------------------------------MLPFVREFVETPAGP-------------------VPRVRTRPDWRDRFGTLRARLG-F-RNDYKIVPGLYCVGRP-GPDSPVLVTCNYKLTFDALRRELGDT-------------------------DAWLLALDTHGVNVWCAAAKGVLSTEEVARRVRAANLAAIVSHR--VLTLPQLAAPG-----VSAHKLKGLCGFSVRFGPIRAGDLRAYLE-RGE-ADEAMRRVEFPLAERLVLAPVELTQRLHW------LVLLCLLCFALSGLGP---------------EGYSLSLALRRGLLACAATLTGLLAGVLLVPALLPL-LPGRAFSAKG--------------------------------------------------------AVAGGAAFLPLALAAAGFADV-------WE-LAALGCWTVGLGSYLGMNFTGSTPFTSPTGVEKEMRRAMPLQAACLLASLILWVGAPFWGNAL-------------------------
>Desulfovibrio_oxyclinae_DSM11498_(2515862843)
---------------------------------------------------------------------------METPAGT-------------------VPRISSKIRFKDHFGTFLVRTG-FIRTNYRVTPGVHAVGNP-GPDSPVIVTANYKLTFDVVRRDLACT-------------------------DVWLLVIDTRGINVWCAAGKSLFSTDEVIRKIRSSGLEKLVGHR--SVILPQLGAPG-----VAAHEVRKATGFKVKYGPVRSSDLKAFIE-NGLKTTDDMRAVSFTLKERAELIPIEIVMAWRW------ILLALLLFVLLGGIGP---------------WGYDVHAAWSRGWDAFLTGLAGFLGGTALAPLLMSR-LPGRMFWLHG--------------------------------------------------------ALLGAIAAACTAFMVAS--------------GPGPVLIGTAAGSFMMMNFTGSTPFTSPTGVEHEMKRGIPFQLVTALLGLALWIVMPFITGGA-------------------------
>Desulfovibrio_putealis_DSM16056_(2523324479)
-----------------------------------------------------------------------VEGFIDTPAGR-------------------VPQVKTTLERPDHVGAALVRLG-IGRGRYRVAPGLYAVGSP-TPESPVLVTANYKLTFDALRKELAGL-------------------------HLWILVLDTKGVNVWCAAGKKTFGTQELAGRIRSTNLDKVVSHR--KVIVPQLGAPG-----VAGHEVKTLCGFRVVFGPVRASDVTAYLN-AGMKADPAMRRVSFTARERVVVGLVEFANDLKL------MAQLACALFLLAGLGL---------------DVFSLTRAWTGLWSGMAAYFLGFFAGNILTPLALPW-LPGRSFARKG--------------------------------------------------------AETGIVAG---LGAFAFGLPA-------LA-STGLWIGAVVSASWYGMNFTGSSTYTSPSGVEKEMRRAIPFQVAGLILSVVLWRLGIGGM----------------------------
>Geobacter_metallireducens_RCH3_(EHP88436)
-----------------------------------------------------------------------------------------------------MPIVSTEFRFADRLGAWKARWG-IGRMSYLVPPGLYAIGSP-GPEDPVVVTANYKMSYDLVRRELSGR-------------------------NVWFLVLETFGINVWCAAGKGTFGTDELVRRVGMVKLATVVKHR--ALILPILGAPG-----VAAHQVARRSGFRVHYATIRAADLPEYLD-NGMVTTPEMRQLTFTTRERLALTPIELVTTGKWV-----VPFVALLVVLSIVPGGL--------------------LSSPTLVSSLVLFVGTVLAGAVAAPVLLPW-LPGKSFAVKG--------------------------------------------------------AVAGCCWAVLFIGVGRGATG--------WLDAMALFLTVPAVTAFLTLNFTGSTPFTSRSGVKKEMRLGLPMMAVSLLAGISLWIAARFF-----------------------------
>Geobacter_sp._M18_(ADW12506)
--------------------------------------------------------------------------------------------------------MSATLTLADRFGACKARWG-INRMNFLVPPGLYAIGEP-DAQAPVVVTANYKMSFDLVRQALSGR-------------------------DVWLLVLETYGINVWCAAGKGTFGTGELVRRIEQSGLAEVVAHR--RLILPILGAAG-----VAAHRVKQRSGFEIAYATVRASDLPGYLD-NGCVTTKAMRELRFNWYDRLVLIPVELVLVARPV-----VPAAALLYLAAWLLFGA--------------------AAA---AAAACAFLGAVFTGVAVGPAFLPL-LPTRSFAIKG--------------------------------------------------------AFAGLVYCALLYALAGGETWG-------GAATLAAFLALPAVSSFYTLNFTGCTTYTSKSGVKKEMRLGLPVMAGALFAALLFVVAGRLLA----------------------------
>Geobacter_sp._M21_(ACT19119)
-----------------------------------------------------------------------------------------------------MPQLSTSLTAADRLGAWKARWG-INRMHYLVPAGLYAIGAP-DAEAPVVVTANYKMSFDLVRKALAGR-------------------------NVWLLVLETFGINVWCAAGKGTFGTDELVRRVAATALSGVVSHR--RLILPILGAPG-----VSAHQVKRRSGFDVAYAAIRADDLPEYLD-NGGRTTASMRELSFNWYERLVLVPVELVLVLKPS-----LPVALLLYLAAWLAAGP--------------------GAA---ATVVAGYAGAVFTGVAVAPVLLPL-LPSRSFAVKG--------------------------------------------------------GAAGLIYTLLFRLAAGGEGWS-------LPVTLAAFLAFPAVTSFYTLNFTGCSTYTSKSGVKKEMRLGLPVLAGALLAALLLVTVGRMLT----------------------------
>Geobacter_sulfurreducens_KN400_(ADI84278)
-----------------------------------------------------------------------------------------------------MPVISTQLAMRDTLGAWQARWG-IGRMSYLVPPGLYAIGAP-GPGTPVVVTANYKMSYDSVRWELAGR-------------------------DIWLLVLETHGINVWCAAGKGTFGTDEIVKRVGLTSLSRIVNHR--TLLLPMLGAPG-----VAAHLVRQRTGFKVRYATIRAADLPAYLD-NGMIATSAMRQLTFTTVERLVLTPIELVAACKWG-----LPVMALIVLAAGFSDGA--------------------FSPERAVPAAIAWGATIATGAVGAPLLLPW-LPGRSFAVKG--------------------------------------------------------ASLGLLLAALLVWSGRGMVS--------LHEVAALFFITPAVCSFLALTFTGSTPFTSRSGVKKEMRVALPVMTAALVAGLTSWLFGSFLLS---------------------------
>Geobacter_uraniireducens_Rf4_(ABQ24695)
--------------------------------------------------------------------------------------------------------MASELAWTDRLGGWKARWG-IGRMSYLIPAGLYAVGQP-TPADPVVVTANYKMSYDLVRRSLAGR-------------------------NVWLLVLETFGINVWCAAGKGTFGTDELVRRIGATGLAQVVTHR--RLLLPILGAPG-----VAAHEVAGLTGFTVRYATIRADDLPAYLD-NGMVTTPAMRELTFTFRERLVLIPVELVLALKPT-----AAVCAVIFLLAALLGGV--------------------PAG---LWTLLAYAGAVFTGIAVAPLLLPW-LPVRSFAVKG--------------------------------------------------------ALAGLAWSTGYYLLAGGGSWS-------VPVAIAAFLTLPAVSAFYTLNFTGCTTFTSRSGVKKEMRLALPVMGGALAVSALLLVAGLFL-----------------------------
>Geopsychrobacter_electrodiphilus_DSM16401_(2522771244)
--------------MTETENCCTPKVAPTDSCCPVNAPDTVQNCCPPKSGKQSCCPPVADHRKPEYKLEGFIENWLDTPIGE-------------------IPVVARKLNRVDQFGRIAMRWG-IGRNHYAVAPGIYAVGTP-DAEAEVLISANYKLSFDVLRRSLGSI-------------------------NAWILVIDTKGINVWCAAGKGTFGTDEIIRCVKKFHLTKLVTHR--RLIVPQLGAPG-----VAAHLVKNGCDFNVVYGPVRAQDLPAFFT-YNRQATPAMRRVNFTLLDRIVLTPVEITILYRQ------IFYTALALLLLGGIGS---------------QVFSTSAALIRGGSAIATGFSGLVAGAVITPVLLPW-LPGRAFSLKG--------------------------------------------------------IWTGLAIAILLGGSLLPDAGS-------TI-HIALLLQVTAISSYAAMNFTGSSTYTSPSGVEKEMRIAIPCQLIAVVIALGLWLWTAF------------------------------
>Methanocella_arvoryzae_MRE50_(CAJ37437)
-------------------------------------------------------------------------MEASLAKST-------------------VTEIDSEITWKNRFDHFLARWS-WKRNEHLVEPGLYALGKP-TKESPVFVTANYTLSFDALRSSLKGI-------------------------DCYILVLNTYGINVWCAAGKGTFGTDELVNRIALTGLANVVSHK--KLILPQLGAPG-----VNAFEVTKRSGFKVEYGPIRAADIPEYLR-T-GKATPEMRRVKFPVADRIVLIPVELVASLI------PAILLTIAGFLTGGL------------------------------VSALAAVTAVLAGVVLFPVLLPY-LPTKDYSTKG--------------------------------------------------------LFLG-LVLALPFAGYTYLSNSPATVWTVL-WMLTFLLIMPPITAYLSLNFTGSTPYPSRTGVRKEIYRYIPVMAVMAGIGTLIQLTVAALNFLKVI-----------------------
>Methanocella_paludicola_SANAE_(BAI60790)
-------------------------------------------------------------------------MAESISVSK-------------------IVRTTSTLTLKDRLDHFMTRWG-YRRAYHRVEPGLYSLGNP-TAESPVLVTANYTLSFDALRSNLKDV-------------------------DCYILVLDTKGINVWCAAGKGTFGTDELMNRIKATGLEGAVSHR--KVILPQLGAAG-----VSAFSLKEWCGWNVEYGPVRAEDLPEYLK-T-HRATPAMRKVLFGLWDRIQLIPVELVSVFL------AMAAASIILYFIMGL------------------------------TAALAALACVLAGVVLFPVLLPY-IPVKDFSAKG--------------------------------------------------------LILG-LLVALQFAYIAFTAPGSATLNAVA-AAG-YLLAMPPVTAYLALNFTGCSTFTSRTGVRREIFTYIMPMAVMFGLGALIFIGLNVARFMGVA-----------------------
>Methanocorpusculum_bavaricum_DSM4179_(2525334638)
----------------------------------------------MK---ITETSGSCCSCSSTSGDQTCGCSWNCCQNTS-------------------IQTTTSRIIFADRLDHLLARLG-WRRSEHRVEPGLYRLGDP-DADSPVFASANYSLSFDALRSPLAGI-------------------------DAWILVLDTKGINVWCAAGKGTFGTDELVHRIESSDLAGIVSHR--TIIVPQLGAPG-----VSWVDVAARTKFTVEYGPVRADDLPEYLK-T-HTATPAMRRVEFSLRDRLVLTPVEFMHAAL------PALAAAAALWFLAGP------------------------------VASLAAISAVLAGTVLFPLLLPV-LPTRDFSTKG--------------------------------------------------------MILG-MIVSLPFAYVFGTYPNLPVWAGVL-SAAAVFLLITPVISYLALNFTGCTPFTSRTGVKKEIFSYIKVMAGMAALGVISGIILSVSRILGVI-----------------------
>Methanofollis_liminatans_DSM4140_(EJG07630)
------------------------------------------------------MAQTDCDCCPESAP-----CDCTQGVPE-------------------VRTTDSLITLAHRLDHVLARWG-VDRMGHRVEPGLYSLGRP-TPASPVFVSANYTLSFDALRSALAGH-------------------------DGYILVLDTRGINVWCAAGKGTFGTDEVVGQIARTGLSSVVEHR--TLILPQLGAPG-----VSAHEVLRRSGFRVTYGPVRAADLPAFLA-A-GTATPEMRCVRFPFADRIVLTPMELVHAAL------PTLAGAVLLYLLAGL------------------------------PAALGALAAVLAGTVLFPALLPF-IPTRDFSTKG--------------------------------------------------------LVLG-GVVALPFAWAVSGDPALPGWA-----ALAPLLLMPAVTAYLALNFTGSTPFTSRTGVKREIFRYVPVMAAMALSGVVLVLLLAAARLTGAI-----------------------
>Methanolobus_psychrophilus_R15_(AFV22798)
-------------------------------------------------MDDDKKSSLSCSCASGYDTTSFIDLTHNKLVSE-------------------LRTVTGKLTLNDRFDHFLARWG-MNRMGHIVKPGLYKMGRP-NADSPVLVSANYTLSFDAVRSALAGT-------------------------DCYILVLDTKGVNVWCAAGKGTFGTEELVHRIAWSGLSSIVSHR--NLILPQLGAPG-----ISAHEVQRRSGFRVEYGPVRASDLPEYIK-T-RKATPEMRRVQFSFKDRLVLTPVELVHVAL------PTLVAAIILYLLTGP------------------------------LAALAAITAVLAGTVFFPALLPI-IPTHDLSTKG--------------------------------------------------------LILG-VIFAIPFAISFAANPIMPLWTDLL-KSLVPLLIMPALTAYLALNFTGCTTFTSRTGVKKEIYRYVPVMVLMAGSGILILVLLGAIWLMEVI-----------------------
>Methanomassiliicoccus_luminyensis_B10_(2518907384)
--------------------------------------------------------------------------------MD-------------------LFTTTSELTGRDRREHLQARLG-YRRMDHRVEPGLYRLGAP-NAGSPVFVSANYSLSFDALRTALKGI-------------------------DGYILVLDTKGVNVWCAAGKGTFGTEELVRRIEDTGLAGVVEHR--TLILPQLGAPG-----VAGHEVRKRTGFKVEFGPVRAADIPEYLR-L-GKATPEMRRVTFPLRDRAVLIPVEIKTAAP------YLIVVAVLLFLIGGP------------------------------LPALIAITAVLGGTALFPILLPW-LPTRDFSSKG--------------------------------------------------------LVLG-AVLAVPFALWSVAAGGEAGWVLVLYAVSMILLVSP-VVAYFALNFTGCSTYTSRTGVKKEIFRWVPKMAAMAIVGVVALAVSAGSSMGWY------------------------
>Methanoregula_boonei_6A8_(ABS54941)
----------------------------------------------------MAKGHCSCDCSP----------QVPGGVQE-------------------FLYASPAITFADRWDHFKARWG-VHRMGHIVQPGLYKLGLA-TPESPVIVTANYTLSFDAVRSALGRT-------------------------DAWILVLDTKGVNVWCAAGKGTFGTGELIRRIALTGLASVVSHR--TLVLPQLGAPG-----VSAHDVQKFTGFHVEYGPVRARDLPEYLR-T-RMATPAMRRVEFTLRDRLVLTPVEFVFAAL------PMVIAALVLFFLAGP------------------------------IAALAAVAAVLAGTVLFPALLPW-IPAKDFSTKG--------------------------------------------------------FLLG-FVVALPFAAFFSSRVPATDGLPVI-AGLIPLFLFSAIVGYLALNFTGSTTFTSRTGVKKEIFRYVPVMALLAGLGIACWAVAGLLLYLGAGHA---------------------
>Methanoregula_formicica_SMSP_(AGB02006)
----------------------------------------------MKGGNDMEQSKNPCTCMPELQTRSCGCQESALKPAG-------------------IRTTDSTITFANRFDHFLARWS-WKREAHRVEPGLYRLGNP-GTESPVFASANYTLSFDALRSALAGT-------------------------DAWILVLDTKGINVWCAAGKGTFGTDELVRRIESTGLAGIVSHR--KVIVPQLGAPG-----ISWPEVMRRTKFLVEYGPVRARDLPEYLK-T-HAATPAMRRVEFPFIDRLVLTPVEFMHAIL------PTAALAAALWFLAGP------------------------------VAALAIIAAVLAGTVLFPALLPF-IPTHDFSSKG--------------------------------------------------------LMLG-VIIAIPFAYAFGTAAGVPAWANAA-GALAAVLVMPAVTAYLALNFTGSTTFTSRTGVKKEIFRYVPVMAVMAAAGSLAAIILGVSRLLGVI-----------------------
>Methanosphaerula_palustris_E19c_(ACL16382)
-----------------------------------------------------------------------------------------------------MMQTTSRLSSADRRDHLLARLG-VDRMGHLVRPGLYELGHP-DRTAQVIVTANYTLTFDAVRSALDGI-------------------------DVYLLVLDTYGVNVWCAAGKGTFGTDELVRRIEATGLAGVVDHR--RVILPQFGAPG-----VSAPEVVRRSDFRVEWGPVRARDLPAYLA-N-HTATPEMRQVRFPLRDRLVLIPVDLRSILL------MMVAGAVVLWLLAGL------------------------------GTARDLVVAMLTGTILFPILLPY-LPTRDFTTRG--------------------------------------------------------YLLG-MLVMIPSVLLDLSQG--GGWLVEAGRVVVDLTVFPAITAYLALLFTGATPFTSRTGVRREIFRYIRPLAGIAVVGIVTAVALRLVTGGV-------------------------
>Syntrophorhabdus_aromaticivorans_UI_(2509867054)
-------------------------------------------------------------MRPPRLDQSFVTGTIETAAGP-------------------VPRVSKVFSRADRIGAFKVRWG-IGRMSYRVDAGLYATGKP-TAESPVFVTANYKLTFDLLRRAIASI-------------------------DGWILVLDTLGINVWCAAGKGTFGTDELVDRIEFSRLGDVVSHR--KLILPQLAGPG-----VAGYEVKKRSGFQVIYGPVRAEDIPEFLR-QGLKAEERMRIKDFRFMERLALVPMEVVPAVKSA-----LYAVAGLLVLC-FLFAG----------------LSTSKALGWFVIPAAAIGTSILAGAVLTPLLLPW-LPGRAFSIKG--------------------------------------------------------FVVGILSALLVVSFIHS---------SGILGMGVLLVSIPAMTAYLAMNFTGSSTFTSLSGVRKEMRFALPLEIGGAGAGLLLWIIALLGG----------------------------
>Syntrophobotulus_glycolicus_DSM8271_(ADY56639)
------------MKARIRKSSCCSSGCCCGAEDAEN-------------------------------------SAVQQN----------------------IPVISTEISFKDILGAWKVRWG-IGRMSYTVAPGLYAVGSP-DRTSPVLVSANYKLTFDSLRKELSAL-------------------------NCWLLILDTKGVNVWCAAGKGTFGTDELVSRISATGLSEVVSQK--KLILPQLGAVG-----VSAHEVTKRTGFSVIYGPVRAKEIKKFVD-SGFQATEEMRTVRFTAWDRLALTPIQLMQAAKS------GLMVLGMLFLINLFA---------------------IRLFG--LSDFIIGAGSVMMGTVITPLLLPF-IPGRAFAWKG--------------------------------------------------------WLVGFIWTAVFVWFRGWLV------SDNLLLGIGYLLVLPSLSAFLAMDFTGSSTYTSFSGVIKEMKLSLPFILASSVIGIVLVLIKSFMA----------------------------
>Bdellovibrionales_bacterium_RIFOXYB1_FULL_39_21_OFZ38049
-----------------------------------------------------------------------------------------------------------MKDYFWYCCSILFRYF-----PLRYPPGIVALGHP-DKNSLVLISGNYFLTVFKLKRILKN-------------------------LNCYILVVDSAGVNVWCAAGAGDFNENKVVDAIFTYKLDELVSHR--RVILPQLAAVG-----VDLQILRQRSGFNGEWGPASFYDLPEYLAQDKRSISERMHILRMPFFDRMELAIGMVGTYFLSY-------LKYYIIFAL---------------------------------FLGMQYNHDVFLITIAYTITILL-TPFLDFLPFKWATNN----------------LMVISIPSYFFLWWYVESYPAFIHMLPIYLLANSVFTILICMDILGSTIHFKSSVANWLCTFNNKSYFGPKLVSERCTKCHACQNICPKGIIGEEDNGYPS-FQLELECCECLACVKQCQALAILNINAPKFKGDIKSIPQEQLAQVMGEKYY-
>Bdellovibrionales_bacterium_RIFOXYC1_FULL_54_43_OFZ55613
-------------------------------------------MEQKGAPPGLAPGYRAAERVIQLKKLLSAVSWAGIEQSM-------------------RSAISSEWTFSDHWGQLRSRVS-GFRMRYTVEPGIYALNSP-GEDSPVIATANYKLSFDKVRRALTG-------------------------KSAWILVLNTHGINVWCAAGKGRFGTFELMKRIREAELEKLVRHR--KVIVPQLGAPG-----VVAHRVQKETGFRVFYGPVRAADLPLYID-NGMTASREMRLIQFPMFERLVLIPMEWVPGFRK------TILPATALSALS-----GL---------------LFG--WSVARDVFFLFQLMLIAGAVGVPALLPW-IPGRAFAFKG--------------------------------------------------------WILGMFACLVYPGLVPPGLFEN-----TWI-AAAAFVFFPLLSSFVALEFTGATPITGMSAVKREMRFAVPIYRAALYISVTLFMIAAAAELPARMVAKAGAAVHGGEARQVTR-----
>Unclassified_Aminicenantes_OP8_Bin144_Ga0207195_10359
--------------------------------------MKIVKKDNGCCASSCDCETATKPQALPDMNRFYISGAINSKIGQ-------------------IPRTPSTLSARDKWENFKVRCA-IGRMKYTVEPGLYGVGDP-DAASMVLVTANYKLSFDALRKELQG-------------------------INAWILVLDTKGINVWCAAGKGTFGTAELVHRIEVSGLKEIVSHK--KLIVPQLGAVG-----ISAHHVKQQSGFSVIYGPVRAADLPVFLE-SGLKTTAPMRRVGFTMIDRLKVIPVELVMGFRA------LVYIALVFFLISGFTAKGD-----------------IFTWRAGVLPILYLVAAYLAGVVLGPLLLPW-LPGRSFAVKG--------------------------------------------------------AFAGLIAFAGVYFTTLSASN--------TFEIFAWMLLITSLSSFLTLNFTGASTYTSLSGVKKEMRLAIPSQSMAAVLGAILWIGVRIHII---------------------------
>Unclassified_PVC_group_bacterium_Bin55r1_Ga0224692_11583
-----------------------------------------------------------MECCCKKKREYWITGSVETPAGK-------------------FPRIGTRLTFRDELGALKVRFA-IGRMGYTVPPGLYAVGEP-TPESPVFVTANYKLTFDYLRCALGG-------------------------THGWILVLDTKGINVWCAAGKGTFGTAEIVNRVRQTQLDRIVAHR--KLIVPQLGAPG-----VSAHEVQKLCDFQVIYGPVRAEDLPAFLE-ANFKTTPEMRRVNFTIHDRIAVIPVELVIWFKQ------ALGLAVLITLLSGISRHG-----------------FSLAAAP--RAFGVVYTGWLAGGALVPILLPW-LPGRAFSIKG--------------------------------------------------------LWAALALWPFLSTFGFLGTS--------PTERIGWGLLLASIVSFMALNFTGTSTYTSMSGVKKEMKIAIPLQLIAAVAGIAGLLVGGWK-----------------------------
>Bacteroides_sp_SM1_62_KPL23093
------------------------------------------------------------------------------MQGT-------------------ILIADRKISLKNNVDHLLARLG-INRMGYLVTPGLYRLGDP-GPESPVFITANYTLSFDALRSSLKEI-------------------------DCFILVLNTFGINVWCAAGKGTFGTEELIRKIDETRLHETIKHR--TLILPQLGAPG-----VSAHRVKEKTGFNIKYGPVRAADIPDYLG-N-KKISAGARRVKFTLLDRLILIPVEFIHVLL------PMLILSGILYLTVGL------------------------------MPALALASAMIAGSVLFPVLLPW-LPTKNFSTKG--------------------------------------------------------FILG-GVVAFIFGSVHILNHSNQAWVFTLISTMAYILSLPPVTAFLALNFTGATTFTSRSGVRKEIYAYFPAMVWLFAAGMFFFSTAIIVSSTVSK-----------------------
>Bacteroides_sp_SM23_62_KPL16088
------------------------------------------------------------------------------MQGT-------------------ILIADRKISLKNNVDHLLARLG-INRMGYLVTPGLYRFGDP-GPESPVFITANYTLSFDALRSSLKEI-------------------------DCFILVLNTFGINVWCAAGKGTFGTEELIRKIDETRLHETIKHR--TLILPQLGAPG-----VSAHRVKEKTGFNIKYGPVRAADIPDYLG-N-KKISAGARRVKFTLLDRLILIPVEFIHVLL------PMLILSGILYLTVGL------------------------------MPALALASAMIAGSVLFPVLLPW-LPTKNFSTKG--------------------------------------------------------FILG-GVVAFIFGSVHILNHSNQAWVFTLISTMAYILSLPPVTAFLALNFTGATTFTSRSGVRKEIYAYFPAMVWMFAAGMFFFSTAIIVSLTVSK-----------------------
>Bacteroidetes_bacterium_GWA2_32_17_OFX29274
--------------------------------------------------------------------MSYIIGHTNNN----------------------IPIVTTNLNFLDLLGNVKVRCS-IFRNNYKVKPGLYAVGTP-DKNSDVLVTANYKLSFDHLRKNLIG-------------------------INAWILVLDTKGINVWCAAGKGTFGTKELISKIQEFLIDKIVEHK--RIIVPQLGAVG-----VSAHEVKNATGFNVKYGPVRATDLKAFLS-NSYRADKKMRTVFFSFKDRLILTPIEFIGHLNY------FIFLLAIVFILSCFKNATF---------------NVDNAWNYFYVPFISLTASYIIGTIITPVLLPF-IPTKNFSFKG--------------------------------------------------------IILALIFSVILLVLNVINIS--------VLEIISFFFLNIAIASFTAMNFTGASTFTSLSGVKKEMEIAIPVQIILFVVGFVIWT-VTRFI----------------------------
>Bacteroidetes_bacterium_GWF2_35_48_OFY38355
------------------------------------------------------------------MQTDFIVGSLQLNSVS-------------------IPVISDFLNFGDILGAIKARWA-INRNNYKINPGLYAIGKP-NENSNIFVTANYKLSFDHLRKNLKN-------------------------IDSWILILDTKGINVWCAAGKGTFGTEELIKQIQQTKLVEIVNHK--KIILPQLGAVG-----VSAHDVKKITGFHVIYGPVKASDIPDFIN-NKFTASREMRTVFFPFFERIKLIPVEIIGHFQY------LIFAIAVFFILAGINSNGY---------------SVDKAFDGGLKAMVMLLAGFLSGVAIAPALLPY-IPVKQFFMKG--------------------------------------------------------AILAYIITGLLIYF-FPGIS--------LFENISWFFIVPAVSAFIAMNFTGTSTYTSLSGVLKEMKLAIPLQIIFAFIGLVLWI-IGRFI----------------------------
>Bacteroidetes_bacterium_HGW_Bacteroidetes_21_PKP19910
------------------------------------------------------------------MLPEYINSTLKTPVGD-------------------VWQVASQWSRKDLWETIKVRWN-LGRMNYRVKPGLYAIGNP-DENAHIFVTANFKLSFDHLRRALKG-------------------------MNAWMLVLDTKGVNVWCAAGKGTFGTKELTYRIKAHELSKLVSHN--KIIVPQLGAVG-----VSAHEILNNTGFHVIYGPVVASDISDFVK-QGLKASPEMRKIEFPLKDRLKLIPVEITFGGFY------LLLVPALFFVLAGLSLSGY---------------SVDDAWYRGGRAVLNLFAAYFAGCVVTPALLPW-IPFRRFSVKG--------------------------------------------------------LISAWAIAALLYFTVGLGNS--------LVEIVSWLLIMGGISSFLAMNFTGSSTYTSLSGVLKEMKISLPTQIVGASLGLLGWI-VSLFI----------------------------
>Bacteroidetes_bacterium_RBG_13_46_8_OFY57839
------------------------------------------------------------------MNIDFKNTRLVPLAST-------------------LPHVSTKLGMSDYLGAVRARMG-IRRDAYRINPGLYAVGNP-TSASDVFVTANYKLSFDALRKNLDG-------------------------MDGWILVLDTKGINVWCAAGKKTFGTAEMVRQIGLTSLDKIVSHK--RLILPQLGAPG-----VSAHKVREASGFSVIYGPVRASDIKAFVS-AGYRATKEMRRVHFGFSDRLKLIPNDLIYGKYY------LLAGIALVLILSGLSNSGL---------------SFQRVRENGPWMALNIVYAYISGIVLTPAMLPW-IPLRPFALKG--------------------------------------------------------FITGFAVSLLLLVFQRLGND--------YYEMTSWFLIITGISSFLAMNFTGSSTYTSLSGVKKEMRVAVPLQIVFAVTGLVLLT-ISRTKV---------------------------
>Bacteroidetes_cellulosolvens_DSM2933_KNY29400
-----------MDNKSCCGSDDRDSKAKEFIKINTQ-------------------------------------ISIPGQFGSLASPLNSKSCCCGDDIKDSITKVSTKLTFKDTLGGWKARWG-INRMNYKVNPGIYAVGDP-DKSSPVLVTANYKMTFDALRKELSGL-------------------------SAWIMVLDTKGINVWCAAGKGTFGTKELITRIGKIRLNDIVAHR--TLILPQLGAPG-----ISAHEVTKSTGFKIVYGPVRATDIKEFIR-SGMKATGEMRTVKFSTYDRLVLTPMELVPTFKV------SMIVFGILFLLNLIA---------------------AKPFG--MVDFYGYAGAVITGCVLAPVLLPW-IPGKAFAWKG--------------------------------------------------------WLLGFLWAIAVNIINGWPQ----LPSYSLVRALGYMLILPAVSSFYAMNFTGSSTCTSFSGVLKEMKMAIPIIIAMIALGAVMILLNSFIGL---------------------------
>Cand_division_OP9_SCGC_AAA255_N14_2265072415
-------------------------------------------------------------------------MKIEEKQTE-------------------FYVCDSIITLANRWDHFLARFG-WRRNHRRVKPGLYKLGNP-TQESLVFASANYTLSFDALRSSLKEI-------------------------DGYILVLDTRGINVWCAAGEGTFDTDELVHRIEMTELSKVVNHR--SIILPQLGAPG-----ICAHEVGKSSGFKVEYGPVRSSDLPNYLK-T-RTATAEMRRVRFNLRDRLELIPVEIMAFLF------IAIIAILIGLFTGEI------------------------------WKSLQILGILITGLVLFPILLPW-IPTRDFITKG--------------------------------------------------------LLLGGVAVMMIYFLPAYLMNGIFGWALAW-ETLINMLIMTPVVAFLALNFTGSTTFTSRTGVRREIFTYIPILTAMFISGIIFSIVMYLIKLRS-------------------------
>Chrysiogenes_arsenatis_WP_152514490
-----------------------------------------------------------------------MTT-----------------------------PTLLHFGLKDFWLAFWQWMR-SYRLFEQIPPGLYYTGAHYPSSSPMLVTCNYHLTVFLLWWRVLRFL----------------------PPQR-ILVLDTAGVNVWCASGKGTFSADEILRQLARYPEAVTGSLKGMELILPKLGFSG-----VQLATLQR-VGITPRIGPIYMTDIPAYLA-QQPHADFAG-IYRFTLRDRLFTLPPSTIQIATY------LALPTVAAWVLHQFFAT---------------------------QIWWQIFAGGIAIAWLYIVLFPI-LPSKRFAIKG--------------------------------------------------------LWLGSAFMLSALLMFAYGGWS-------WLDTLFAILFVLGGSLFFGLYYTGNSGVSNYSIVKYETLRYLPISIGLLIASMAIIVYKAVQA----------------------------
>Elusimicrobia_bacterium_RIFOXYA2_FULL_40_6_OGS20981
--------------------------------------------------------------------------------MD-------------------IPKVSTKTNLSDKLGTVMARLT-LNRANYKVEPGLYAVGTP-STNSNVFVSANYKLSFDSLRKELGG-------------------------MDAWILVLDTKGINVWCAAGEGTFGTQELINRISETKLNEIVTQR--KLIVPQLGAVG-----VAAHIIKEETGFNVVYGPVRAKDIPEFLK-AGMRATPEMRRVNFTFVDRSKLVAAEFAMGFKY------LFIVSVILIAFAQ------------------------------YNLCANILLAYFGGTVLGPLLLPW-LPGRAFSLKG--------------------------------------------------------VSAGLITFLIAYFFGFAGKN--------ILSIAGSLFLMTALASFMLMNFTGASTYTSFSGVKKEMKAAVPLQAGALVVGLVIIV-VKIFIRS--------------------------
>Elusimicrobia_bacterium_RIFOXYA2_FULL_47_53_OGS16464
----------------------------------------------MADNKNAPCCGPSKLVKIDFIKVKTLSQLTVG-GKT-------------------VPVVGGAWSFNDHLGRIFVRLG-LRRMNYAIKPGLYAVGLP-EASSRVFVSANYKLSFDILRREVSGL-------------------------NAWLLVIDTKGVNVWCAAGKGTFGTQELIASVRETGLDSTVSHR--ELVVPQLGASG-----VSAHLVKRDSKFNIVYGPVRARDIKKFLG-NGAKADEDMRQVSFNLFDRLTVVLLELSLALKSVILITLALLAAALAAYYSGI--------------------FKSAYIQAYFLAAAVWTG-YFSGTLLFAALLPW-LPFRAFSLNG--------------------------------------------------------ALAG-FAGAFIALLSFGLFGHLDIYLFEI---ISFSAISSAVAAYLALNFTGSSTYTSLSGVKKELKYAIPAIAAGASAGLLVM---IAGFIIKGAA----------------------
>Elusimicrobia_bacterium_RIFOXYB2_FULL_48_7_OGS29648
-----------------------------------------------------------------------------------------------------------------------------------------------------------------LRKELSGPA-----------------------GDAWILVLDTKGINVWCAAGEGTFGTEELINRISETKLGEIVSHK--KLILPQLGAVG-----VSAHIIKKETGFSVIYGPVRASDIPAFLK-AGFKATPEMRRVSFNLVDRAKLVAAEFALGLRY------LLIACAVILAVELTLNRG-------------------FSIRQDYALFVNIFLAYLAGTVLGPLLLPW-LPGRAFSLKG--------------------------------------------------------AFAGLIVFLAAWYSGFLGSS--------VLVLTGWFLLMASLASFMLMNFTGASTYTSFSGVKKEMRSAVPLQAGAFAAAVLIAL-IKLFVKGAPLTFLSK------------------
>Nitrospira_bacterium_SG8_3_2_KPK34762
-------------------------------------------------------------------MWHFVADFTTTPVGK-------------------VPRIDTTLKIQDFAGTLRARLG-ILRDRYRVAPGLYSVGRP-TAESPVLVTANYKLSFDSLRRELASI-------------------------DAWILVLDTRGVNVWCAAGKRTFSAEEVIRQVNLIGLERLVCHR--ELILPQLGAPG-----VSSQAVKKGCGFKVVWGPIRAKDLKNFLN-NRCRTEAATRQLSFTIAERTVLIPVELSLIVKP------SLAILLAVFLLSGIGP---------------EIFSFSAAWIRGLNGAVAYLFGVLAGAIIVPILLPW-LPMRRFYIKG--------------------------------------------------------ILTGLVAGIFVVLLVGGTMSR-------LE-SLTLLLITAAVSSYAAMNFTGATPYTSPSGVEKEMRQGIPIQIIAVVAAVIAWVAAPFVN----------------------------
>Nitrospira_bacterium_SG8_3_2_KPK26723
------------------------------------------------------------------------MGSVQTPGGE-------------------IPQISSFLGWADRLGSIKVRWG-IGRMRYTIEPGLYALGSP-CDDSPVLVTANYKMSFDRLRQALPGL-------------------------HAWLLVLDTQGINVWCAAGKGTFGTTELVNRIESSGLGRVVSHR--NLILPQLSGPG-----IAAHEVKKLSGFKVIYGPVRATDLPAFVE-AGLNATPEMRLKTFTTWERVVLIPVELVEALKAI-----VIIIPVMLIVS-GFLGPG---------------GFWENILSYGLFSIPALLAAIMAGAVLTPLLLPW-LPGRAFSFKG--------------------------------------------------------LVIGLLAAAVLMASRWGTLG----SWEARLETLAWCLLVLAATAYLAMNFTGATTYTSLSGVKKEMRWALPLEIGAGFVGLALWVSALIMA----------------------------
>Nitrospira_bacterium_SG8_3_2_TES56118
-----------------------------------------------------MLLRRTKTMETKHWITGTVNTPAG--AVY-------------------K--VSTEITNAELLEHLLCRVS-GFRNSYTVTPGLYAVGEP-NQDSHVVVTANYKLTFDKVRESLAG-------------------------ENVWIMALDTKGINVWCAAGKGTFGTEELIKRILDTQLTVLVTHR--KIIVPQLGAPG-----VSAHVVKKITEFQALYGPVRVSDLKDYIK-SGCKATKEMRRVHFSTIDRLVLTPMEIIPAMGI------FAVFAVIMFLFFGLSATGI---------------NFVSAAKGAFPFLVLALTAILSGAFITPMLLPI-IPFKSFAVKG--------------------------------------------------------LIVGVLMTWFSKMLFPSLLSTT-----TEL-TIFAYIFFPAISSYAALQFTGATTFTGMSGVKKELKYAVPLYITTAVISIVMLALYKVNLWRAL------------------------
>Nitrospira_bacterium_SG8_3_2_KPK25308
-----------------------------------------------------------------------MTGALKTRIGE-------------------VPQVSSSLALADHWGTMKARWG-VGRMRYTVDPGLYALGSP-DDQAPVLVTANYKMSFDRLREALPKR-------------------------DAWILVLDTKGINVWCSAGKGTFGTAELVRRIQTSDLGRIVAHR--TVVLPQLAGPG-----VSAHEATKQSGFKVIYGPIRANDLPAFVD-RGFKASREMRRKTFTISERAVLIPVELVGTLKAA-----LIIVPLFFILA-GLGGPD---------------PFWANTFNYGIFSVLALLAAVTAGAILTPLLLPW-LPGRAFTTKG--------------------------------------------------------LGVGLIVASILAIFRSGFFD----TWIGRLELLAWFFLVPAVAAYLAMNFTGSSTYTSLSGVKKEMKWAVPLEIGAGVVGLFLWLGSRFLA----------------------------
>Nitrospirae_bacterium_GWC2_56_14_OGW38354
----------------------------------------------------MQTTVKFVKKGAPRWVSGAIKTPAG--AVS-------------------R--VSSDWSRTDMLGMIKSRIG-AYRMHYTVPPGLYAVGEA-TRDSDVFVTANYKLSFDIVRRALKG-------------------------MDAWVLVLDTQSINVWCAAGKGTFGTDELVRQISVARLSEVVGHR--RIILPQLGAVG-----VSAARVNKETGFRVSFGPVEARDIPAYVA-AGYKKTKEMSLVKFSMLDRLVLTPMEINPIMKK------YPWFAGAVLLLFGLAPTGI---------------LFQQAWQGGLPFLALGLAAVFAGAFVTPVLLPF-VPFRSFAMKG--------------------------------------------------------WITGMLITFLTMQAMGGATGQS-----ALL-LAAIYLFFPALSSYIALQFTGSTTYTGMSGVNKELKIGIPLYIITTVVSLLLVVLFKLREWEVL------------------------
>Nitrospirae_bacterium_GWC2_56_14_OGW34114
-----------------------------------------------------------------------------------------------------MPLIATELLFSDRLGAWKTRWG-IGRMNYLVPPGLYAIGTP-GATDPVVVTANYKMSYDIVRSQFGGR-------------------------NVWLLVLETFGINVWCAAGKGTFGTGELVRRISETRLAMVISHR--QLLLPMLGAVG-----VAAHEIARRTGFTVRYAAIRAEDLPEFLD-KGRVTTSAMREMTFTFRERAVLVPVEFVMALKPA-----AVIMLCVSLFGALLGRP--------------------GAG---IEAAVAYFGAMLAGTAVAPILLPW-LPGRSFSIKG--------------------------------------------------------AVLGFAWSALWLLLTG-AAWN-------SLSTVAAFLVLPAVSAFHALNFTGCTPYTSRTGVKKEMRAALPAMGTAVLAGGILLIINGILG----------------------------
>Nitrospirae_bacterium_GWF2_44_13_OGW30936
-----------------------------------------------------------------------MKKAAGQPAVS-------------------K--VSSEWTWTDHFGQIRCRIS-SLRMRYTVGPGLYAVGEP-DRESDVFVTANYKLSFDILRRELKG-------------------------LNAWIIVLDTKGINVWCAAGKGTFGTDELISRINEINLHNVVAHR--RIIVPQLGAVG-----VNARIVQQRTGFRVYFGPVHAKDIPAYIR-AGYIKTPEMRLVRFNMMDRLVLTPMEINPAMKK------FPLFGLIILLLFGIQPSGI---------------LFKDAWEEGMPFLIFGLTAVFSGAFMTPLLLPF-IPFRSFAVKG--------------------------------------------------------WLTGVIAVFALMQGIGGFWHYS-----SLLPLVAAYIFFPLASSYIALQFTGSTTFTNMSGVKKELKIGVPVYLTATATSLLILVMYRLSQWGII------------------------
>Nitrospirae_bacterium_RBG_19FT_COMBO_55_12_OGW52723
-----------------------------------------------------------------------MSTAVG--LIY-------------------I--VSADWSRADYWGMIKSRVS-AFRMNYSVPPGLYAVGDP-TNDSDVLVTANYKLSFDTLRRELKG-------------------------LSAWILVLDTKSINVWCAAGKGTFGTEELIKRISDTRLDAVVGHR--RIILPQLGAIG-----VNASIVQKKTGFRVSFGPVDARDIRAYIE-AKYKKTPEMSWVRFTILDRVILTPLEINPAMKK------FPLFAAVVLFLFGLQPSGI---------------LFAKAWYDGMPFLFLGLISVLAGAFLTPALLPF-IPFRSFAIKG--------------------------------------------------------WIMGMLPVFLVTRVFNTIDRHD-----TIL-LIVAYLLFPALSSYIALQFTGATTFTGMSGVKKELKIGLPIYIGTAGVSLVLMIVYKLKEWGVV------------------------
>Unclassified_Spirochaetes_Bin043_Ga0224667_111215
--------------------------------------------MSLLLKHRTEIEPQAGFIALNELRKPWIVRFMVFAGRT-------------------IPVVSTTLKGSDIWGGIKARWG-VGRMDYRVLPGLYAIGKP-ADDAAVFVTANYKLSFDALRANLSGL-------------------------DAWVLVLDTKGINVWCAAGKGTFGTGELVSRIAKVRLSSIISHR--NLILPQLGAPG-----VSSHQVAKRSGFQIMWGPVRAEDIPAWLA-AGMKKDEAMRLVTFNLRERMAVAPVEIVHSWP---VVFAALALG---ALYGLP--------------------VGPGWLPRMLPATIILVGTVPVGTILFPALLPW-LPGRAFVIKG--------------------------------------------------------ALLG-TVWAVLCASVFRMP------LMAA---MGGVLIAAPLAGFLGLNFTGASTFTSQPGTLLEVEKSFWPLIVSAVAGIALT---IASRIFGI------------------------
>Unclassified_Spirochaetes_Bin152_Ga0224669_11154
-------------------------------------------------------VDIIAAIFKQSFIEGKITLADY--EIP-------------------T--VSTVLSRRDKWEHFKARIS-SFRNRFMVIPGLYAVGTP-DSESEVFISANYQMSFNYLRQALNG-------------------------TNSLILVLDTKGINVWCAAGKGTFGTAEIIKRIRSHNLPNIVRHR--RIIAPQLGAPG-----ISCSEVKNYTGFRIYYGPVRAEDIPKFIA-QNLKADDEMRRIKFTFFDRLILTPMEINPALKK------YPYLAIIFFILFGLTPEGI---------------IFKKAFYDGLPFYIGGLSAIFTGAFLTPLLLPF-IPGRAFAVKG--------------------------------------------------------TLVG-LAVFIPLTQFPAILQFN-----GQLEKSAFIIFFTSLSSFLATQFTGSTVYTHLSGVKKELKIALPIYIIGVIISVGLIIFSKFVNL---------------------------
>Unclassified_Spirochaetes_Bin159_Ga0224664_10534
-----------------------------------------------------------------------MEKCCSQKTTE-------------------PITLDTIYTAADRLRDIMIRFG-INRNNYLITPGLYKIGKP-DMHSQVLVTSNYKLTINRLKQELSCL-------------------------NVWIIVLDTKGVNVWCAAGKGTFGTDELVRKIESTGIKNRVVHN--NIIVPQLGAVG-----INKYAIKKITGLTVHYGPVRAKDIKDYIN-NNYTKTDKQRQITFKLTERLPLTPIEFFISLKY------LLIFFVLSMILHFIRN--------------------KGVNGTIIYELLPILAAYTGGTILFPIVLPY-LPGRSFALKG--------------------------------------------------------GILGLIISIAVILTIKPALII----------AIAIILTLTPLVSFLSLNFTGSTTFTSLAGVKKEMRIGLPIQLISVISGITLYVIGYLVN----------------------------
>Unclassified_Spirochaetes_Bin180_Ga0224672_11065
-----------------------------------------------------------------------MSTSCCTSESL--------------------APKPYRSGFFDLVKLVLCYLR-GFKATFSYRPGIYYTGDLYDPSAPLIVTGNYHLTVYNLFRVLKKRA----------------------ARVXXXXVIDTKGINVWCSSGKGQFSSELIISTLNRFEPSTVTTGGKLRLILPKLSLSG-----VSLQTLRN-NLINPVIGPVYMKDLLAFLD-GNFRKSVIGDKYLFNLKDRLFILTPSLIQFSLN------LIIVTAVTVLINLIFKT---------------------------GVTYQPFVIGILTGATYIVLFPV-LPTKFFSVKG--------------------------------------------------------LVLSIIPVTFLSLSYFTGNYSG-----GLLNYLFYSIYYVAIGLWFGLYFTGNSGVSNYSIIKREIMIFLPITFALLLAGMITLILKGVLHA---------------------------
>Spirochaetes_bacterium_GWB1_27_13_OHD16550
-----------------------------------------------------------------------MVGYKEINGKK-------------------IPEISTKIDFSDIFGEIKARWG-INRMNYQITPDIYCIGNP-TKDSPVFVTANYKLSLDKLRKELVGL-------------------------DCFILVLDTKGINVWCAAGKGTFGTEELIQRINKVNLSQIVNHK--TLILPQLGAVG-----VSYMDIKKQTGFNVIYGPVLAKDIKPFLL-NNYNKTKEMRTVNFTFKDRITVAPIEFVATIYL------NLIVLAIFTLFNLIFYTKQAH---------------FKIW----LDFIPFFTAIISGTFLIPILLPY-IPGKAFAIKG--------------------------------------------------------LILGLVVITIINFLFN----------LSIFGWISNYFILVPIVSFLAMNFTGATTFTSLSGATLEVTKGVPIMAISLVIGLVLRVLLETKIII--------------------------
>Spirochaetes_bacterium_GWB1_36_13_OHD14484
------------------------------------------MEGS-----------------------------VSTKIGK-------------------VGKIKTKLDWKDTLGGFKVRWG-MNRMNYRIEPGIYAAGNP-SPDSPVLVSANYKLTFDILRKNLSGI-------------------------DAWVLILDTKGVNVWCAAGKGTFGTKELVNRIKKVHLEKIVSHN--TLILPQLGAVG-----VSAFETAKKSGFKVVYGPVRADDLSEYLK-NGLQKTEKMSRVFFHLKDRLAVVPIELVGTKKI------FIILSALCVLFELIS-----------------TQVFGAAFWK---DYALFMGGILSGAVLTPILLPL-IPFRSFALKG--------------------------------------------------------FLMGTIWVSF----FTYFFLP-----HLPLPFAADFLLTASVSSYLAVNFTGATTFTSLSGVKKELKIGLPLMLGGFGIGIILKLLIRLLVLS--------------------------
>Spirochaetes_bacterium_GWB1_60_80_OHD18750
-----------------------------------------------------------------------MTRFL----RR-------------------IPHLRTDLDWRDRLGALAAGFS-FGRGRYRVLPGLYALGEP-DATGPVLVTANYKLTVDLLRAALSGL-------------------------SAWLLVLDTRGVNVWCAAGKGSFGTVELLAKLKQCAVADLVSHR--QLILPQLGAPG-----VSAPAVAKQAGWRIVWGPVRAADLPRFLA-SGLNKTEAMATVNFDMADRLRVAPVEMVQSWP---VLAAGLVLAAVAAIFGRL--------------------DFADRLNRFVRTFLAIGGIWASGTVLFPILLPW-LPGLAFGVKA--------------------------------------------------------GCLG-LAWGVAGSLLLGSG------PWFG---AALTLASGAVVSFLGMNLTGASTYTSQTGALLEVERSTIPQAVSLLLAAVLS---IVGLLVRRGAQL--------------------
>Spirochaetes_bacterium_GWE2_31_10_OHD50409
---------------------------------------------------------------MIVRKERWIRSFINTKIGL-------------------IPVIANTLTHYDTYGTINARIG-INRHNYSIIPGLYASGKP-DANSPVLVTANYKLTFDKVRSSLQGI-------------------------SAWILLLDTKGVNVWCAAGKGTFGTKELIKQIEVTKIGELINHK--SLILPQLGAPG-----VSGYEVTKKTGLSIHYGPVYAKDIPAYIN-RSMVKTDEEKIIHFTTIDRLVLTPIEIKSALVS------SIIAGIIFFIAHSIAS--------------------QSFTLKFLNDYFSFLGAIITGGFIFPLILPI-LPFRSFALKG--------------------------------------------------------ALLGLFYSVILAFFNKSSLGN----------ILFGFCIYIPVISFMALNFTGATTFTSISGVKKEIKIATPLYLLSVITGIIIKIIILIRSAL--------------------------
>Spirochaetes_bacterium_RBG_16_49_21_OHD69644
---------------------------------------------------------------MPHWADGILATSGG--PVY-------------------R--VSTRWTRRDRVGQVRSRIS-TFRMAYTVEPGIYAVGNP-SRESEIFVSANYKLSFDILRRELKG-------------------------LNAWILVIDTKGINVWCAAGKGTFGTEELVSRMAKTGIAGLVDHR--RIIVPQLGAPG-----VDANLVKKESGFRVYYGPARASDIPAYLS-SNYTATREMRTVQFRLIDRLILTPIELNPLLKI------IPVFAMAVLLVFGLQPSGI---------------VFMSAFTHGLPIFILGVIAILAGTLFTPVFLPF-IPFRSFAIKG--------------------------------------------------------WLAGAILIFPYLYYIDWLVPG------KILMTAFSFLFFPMVSSYLGLQFTGASTYTSLSGVKKELKIGIPVYISSGIASLVLLVIYKINEWGIV------------------------
>Spirochaetes_bacterium_RBG_16_67_19_OHD76042
-------------------------------------------------------MLWVPKKTAPPWADGFQETPAG--RIP-------------------R--VAVAWGKAEQRGRRLCRWSNAFRMSYTVDPGLYAAGNP-SPESPVLVTANYKLSFDLLRRELPG-------------------------IDAWILVLDTKGINVWCAAGKGTFGTGELLRRLQSVKLAEVVSHR--RLVLPQLGAPG-----VQAHVVKQESGFAVDYGPVRAEDLPAYLR-AGRKATPEMRAVRFGWKDRLELTPMELLPALRR------YPWLLLGLFLLFGLQPQGI---------------LFRPALAGGWSFALLGLAAILTGSFLVPLFLPC-VPFRSFALKG--------------------------------------------------------WLAGAVLTGAFLALRWGALSGN-----LFL-VVLAAAFFPAASSYLALMFTGTTVYTGLSGVQKEMRFALPLYIAALAVTAACAVLAVLRYWGLL------------------------
>Spirochaetes_bacterium_GWF1_49_6_OHD58719
-----------------------------------------------------------------------MTGSRFTKAGL-------------------IPVVSTKLTRKDKLGEIMVRLG-IKRMNYPAAPGIYAVGAP-DENSDVFVTANYKLTFDLLRKELDGL-------------------------SAWILVLDTHGINVWCAAGKGTFGTDELISRIDKVKLKEIVSHK--RLILPQLGAVG-----VSAHTVTRETGFKVLYGPVRASDIPAYIA-NNYRKTPEMREVTFGFTERLELTPLEIVVSLKY------CLIAVVLIIVANLLR-YQRFD---------------LSVF----NGVLPFTGAILTGAFVVPLLLPF-IPFRAFSVKG--------------------------------------------------------FALGIVGTLALIFLSR----------AALADSIIYLLFLPAISSFFAMNFTGSSTFTSMAGVKLEVRIATPLIIISIAGGVVMELLKTLRVL---------------------------
>Spirochaetes_bacterium_GWF1_51_8_OHD55128
------------------------------MGCGCNSP-------------------------------EWIVGMHNIGLRN-------------------IPRVSGKLSFRDRLGALRMRLG-IGRMKYSVPPGLYTIGTP-DENSDVFVTANYKLSFDKLRESLDGI-------------------------SAWILVLDTKGINVWCAAGKGTFGTDELTGRILRTGLAKIVMHR--KLILPQLGAVG-----VSAYQVTKAAGFKIAYGPVLARDIPGYIA-NGYEKTPEMREVKFGFIDRLILTPIELKAALIP------LLIGLAVYLTVASLR-SGVFK---------------AEFL----IGFLPFLGALITGAVLVPVLLPF-IPGKAFSLKG--------------------------------------------------------SIAGLLWAGASIWIFR----------PDFWTSLIYFLTIPAISAFLAMNFTGASTFTTLSGVKLEVRIVTPFAAVLCAASLALGILQTVNVI---------------------------
>Spirochaetes_bacterium_GWB1_66_5_OHD24105
-----------------------------------------------------------------------METPAG--RIP-------------------R--VAAAWSRAEQRGRRLCRWSNAFRMSYTVDPGLYAAGNP-SPESPVLVTANYKLSFDLLRRELPG-------------------------IDAWILVLDTKGINVWCAAGKGTFGTGELLQRLQSVKLAEVVSHR--RLVLPQLGAPG-----VQAHVVKQESGFAVDYGPVRAEGLPAYLR-AGRKATPEMRAVRFGWKDRLELTPMELLPALRR------YPWLLLGLFLLFGLQPQGI---------------LFRPALAGGWSFALLGLAAILTGSFLVPLFLPC-VPFRSFALKG--------------------------------------------------------WLAGAVLTGAFLALRWGALSGN-----LFL-VVLAAAFFPAASSYLALMFTGTTVYTGLSGVQKEMRFALPLYIAALAVTAACAVLAVLRYWGLL------------------------
>Methanofollis_liminatans_DSM4140_gene_2829
-------------------------------------------------------------------------------------------------------------------------------MGHRVEPGLYSLGRP-TPASPVFVSANYTLSFDALRSALAGH-------------------------DGYILVLDTRGINVWCAAGKGTFGTDEVVGQIARTGLSSVVEHR--TLILPQLGAPG-----VSAHEVLRRSGFRVTYGPVRAADLPAFLA-A-GTATPEMRCVRFPFADRIVLTPMELVHAAL------PTLAGAVLLYLLAGL------------------------------PAALGALAAVLAGTVLFPALLPF-IPTRDFSTKG--------------------------------------------------------LVLG-GVVALPFAWAVSGDPALPGWA-----ALAPLLLMPAVTAYLALNFTGSTPFTSRTGVKREIFRYVPVMAAMALSGVVLVLLLAAARLTGAI-----------------------
>Methanosphaerula_palustris_E1_9c_gene_3545
---------------------------------------------------------------MGCCSTASVPLGSPCSPSA-------------------MMQTTSRLSSADRRDHLLARLG-VDRMGHLVRPGLYELGHP-DRTAQVIVTANYTLTFDAVRSALDGI-------------------------DVYLLVLDTYGVNVWCAAGKGTFGTDELVRRIEATGLAGVVDHR--RVILPQFGAPG-----VSAPEVVRRSDFRVEWGPVRARDLPAYLA-N-HTATPEMRQVRFPLRDRLVLIPVDLRSILL------MMVAGAVVLWLLAGL------------------------------GTARDLVVAMLTGTILFPILLPY-LPTRDFTTRG--------------------------------------------------------YLLG-MLVMIPSVLLDLSQG--GGWLVEAGRVVVDLTVFPAITAYLALLFTGATPFTSRTGVRREIFRYIRPLAGIAVVGIVTAVALRLVTGGV-------------------------
>Methanocella_paludicola_SANAE_DSM17711_gene_5769
-------------------------------------------------------------------------MAESISVSK-------------------IVRTTSTLTLKDRLDHFMTRWG-YRRAYHRVEPGLYSLGNP-TAESPVLVTANYTLSFDALRSNLKDV-------------------------DCYILVLDTKGINVWCAAGKGTFGTDELMNRIKATGLEGAVSHR--KVILPQLGAAG-----VSAFSLKEWCGWNVEYGPVRAEDLPEYLK-T-HRATPAMRKVLFGLWDRIQLIPVELVSVFL------AMAAASIILYFIMGL------------------------------TAALAALACVLAGVVLFPVLLPY-IPVKDFSAKG--------------------------------------------------------LILG-LLVALQFAYIAFTAPGSATLNAVA-AAG-YLLAMPPVTAYLALNFTGCSTFTSRTGVRREIFTYIMPMAVMFGLGALIFIGLNVARFMGVA-----------------------
>Methanocorpusculum_bavaricum_DSM4179_gene_868
----------------------------------------------MK---ITETSGSCCSCSSTSGDQTCGCSWNCCQNTS-------------------IQTTTSRIIFADRLDHLLARLG-WRRSEHRVEPGLYRLGDP-DADSPVFASANYSLSFDALRSPLAGI-------------------------DAWILVLDTKGINVWCAAGKGTFGTDELVHRIESSDLAGIVSHR--TIIVPQLGAPG-----VSWVDVAARTKFTVEYGPVRADDLPEYLK-T-HTATPAMRRVEFSLRDRLVLTPVEFMHAAL------PALAAAAALWFLAGP------------------------------VASLAAISAVLAGTVLFPLLLPV-LPTRDFSTKG--------------------------------------------------------MILG-MIVSLPFAYVFGTYPNLPVWAGVL-SAAAVFLLITPVISYLALNFTGCTPFTSRTGVKKEIFSYIKVMAGMAALGVISGIILSVSRILGVI-----------------------
>Methanomethylovorans_hollandica_DSM15978_gene_1903
-------------------------------------------------MTSEKNSSASCSCAPRSDKNQFITLTSKMQASE-------------------ILTTTSGLTLKNRLDHVFARLG-VNRTGHTVKPGLYKLGNP-TSESLVFASANYTLSFDAVR--LQVL-------------------------TGYILVLDTKGINVWCAAGKGTFGTDELVKRIMWSGLSNIVRHR--TVIVPQLGAPG-----ISAHEVQNRSGFKVEFGPVRASDLPEYLK-T-HKATPEMRRVHFALKDRLVLTPVELRHAIV------PTIAAAIILYLLAGP------------------------------LAALAAITTVITGTVLFPALLPL-IPTHDFSTKG--------------------------------------------------------LILG-LLVAIPFTISFAANPVMPLLTKAI-ISLALIVTMPATTAYLALNFTGCTTFTSRTGVKKEIYRYVPIIALLAGCGILLLMILGAMRFMELV-----------------------
>Methanospirillum_hungatei_JF_1_DSM864_gene_1104
----------------------------------------------MTPEHNMETS-CCCSCS----EPDTACSY------S-------------------IPQTDSNITIANRIDHILARWG-YKRSGHVVRPGLYRLGNP-DADSPVFASANYTISFDTLRLNLKGF-------------------------DAYILVLDTKGINVWCAAGKGTFGTDELVKRIESTGLSHIVSHR--NIIVPQLGAPG-----ISAHMVKQRSGFTVEYGPVRAADLPEYMR-T-GKATSEMRKVSFPIQDRLVLIPIELVHVAI------PTIIISIILWLLAGP------------------------------AAGVAAIAAVITGTVLFPILLPY-LPTQDFSMKG--------------------------------------------------------FILG-GVCAVPFSAMYAQSADLPEWALAA-GAIVPLLIIPAVVAYLGLNFTGSTPYTSRTGVKKEIFRYVPIMAVMTGIGSVIGIVLSIFRLAGVI-----------------------
>Methanoregula_boonei_6A8_WP011991429
----------------------------------------------------MAKGHCSCDCSP----------QVPGGVQE-------------------FLYASPAITFADRWDHFKARWG-VHRMGHIVQPGLYKLGLA-TPESPVIVTANYTLSFDAVRSALGRT-------------------------DAWILVLDTKGVNVWCAAGKGTFGTGELIRRIALTGLASVVSHR--TLVLPQLGAPG-----VSAHDVQKFTGFHVEYGPVRARDLPEYLR-T-RMATPAMRRVEFTLRDRLVLTPVEFVFAAL------PMVIAALVLFFLAGP------------------------------IAALAAVAAVLAGTVLFPALLPW-IPAKDFSTKG--------------------------------------------------------FLLG-FVVALPFAAFFSSRVPATDGLPVI-AGLIPLFLFSAIVGYLALNFTGSTTFTSRTGVKKEIFRYVPVMALLAGLGIACWAVAGLLLYLGAGHA---------------------
>Methanoregula_formicica_SMSP_AGB02006
----------------------------------------------MKGGNDMEQSKNPCTCMPELQTRSCGCQESALKPAG-------------------IRTTDSTITFANRFDHFLARWS-WKREAHRVEPGLYRLGNP-GTESPVFASANYTLSFDALRSALAGT-------------------------DAWILVLDTKGINVWCAAGKGTFGTDELVRRIESTGLAGIVSHR--KVIVPQLGAPG-----ISWPEVMRRTKFLVEYGPVRARDLPEYLK-T-HAATPAMRRVEFPFIDRLVLTPVEFMHAIL------PTAALAAALWFLAGP------------------------------VAALAIIAAVLAGTVLFPALLPF-IPTHDFSSKG--------------------------------------------------------LMLG-VIIAIPFAYAFGTAAGVPAWANAA-GALAAVLVMPAVTAYLALNFTGSTTFTSRTGVKKEIFRYVPVMAVMAAAGSLAAIILGVSRLLGVI-----------------------
>Lentisphaerae_bacterium_RIFOXYA12_FULL_48_11_OGV64895
---------------------------------------------------------------------------------M-------------------VTRVNAQLEWRDVLGAVKVRLN-IGRMAYAVEPGLYAVGNP-EETSPVLVSANYKLSFDYLRRELGG-------------------------LDVWILVLDTKGVNVWCAAGKGTFGTDELVSRIKAVGLEKIVSHR--KVILPQLSAPG-----IAAHEVKKQSGFQVVYGPVRACDIKAFIH-AGMEATPEMRMVRFDFADRLAVVPVEIVEWAPH------VFLLGLAMLGLSGITGVSY---------------DLSLIWTRGFNVFMIVLGAFLGGSILVPALLPW-LPGKAFSIKS--------------------------------------------------------LCVGLVLWGILVSVLNLALD-----------VWAMLPVILSITSFMAMNFTGCTTFTSQSGVKREMRYAIPVQILLLITGMILWVIAGIGGSL--------------------------
>Treponema_sp_GWA1_62_8_OHE66044
-----------------------------------------------------------------------MRPAAK---RR-------------------IPVVSNRLSQADRLGGWKARWD-IGRNDYRVEPGLYASGGP-DRDSPVLVTANYKLTFDTVRKELAGL-------------------------DVWLLVLDTKSVNVWCAAGKGTFGTAELIGRIASERLAELVSHR--TVVLPQLGASG-----VAAHEVLAASGFRVVYGPVRAADIPAFLA-GGMKKDDRMRRVEFRLRDRMAVAPVELAHALP---FLAAAVLASALLAFLPAAGVAGGGGAGGAGGGGGVGGWVSADILSGFWLWTVLLASPVLVGTLLFPALLPW-LPFKAFAAKG--------------------------------------------------------ALLG-LCWSAAAALLAGLG------AWNG---SAFVLVATSLVAFIAMNFTGASTYTNQTGAALEVKIALPAQVAAAAVGLAIAGVRLAGALIQGA-----------------------
>Alkalispirochaeta_odontotermitis_WP037564355
-------------------------------------------------------------------------------MGQ-------------------IPRVKTGLEPADFRGTIKARLG-LRGTEYKIAPGLYAVGSP-GPDSPVLVTANYKLTFDTLRRELTSF-------------------------DGWLLVIDTRGINVWCAAGKTLFSTQEVVYRIQQCRLSKVVQHK--KIILPQLAATG-----VSAVSVKKESGFEVLWGPIQARDIRQYVA-DGCQAGQAMRRVTFTLPERVVLIPVELSHLPKP------TIWVLLAVFLLSGIGA---------------GLFSFNAAWSRGLIALVAYAVGILAGAVAAPILLPW-IPGRAFALKG--------------------------------------------------------SLTGVVAGLAVAVFFGSRLSW-------VE-AAALISFTTAISSYLAMNFTGSTPYTSPSGVEKEMRRAIPLQAAVALIAVVAWVGAAFAG----------------------------
>Desulfomonile_tiedjei_DSM6799_WP041285976
------------------------------------------------------------------MDQPFVTGAVDTFAGK-------------------IPKVSSDLTFTDRFGTYKARWK-IGRMKFVVDPGLYALNDP-DAASPVLVTANYKMSFDSLRSALPGS-------------------------SAWLLVLDTQGINVWCAAGKGTFGTDELVNRIETSGLTKVVSHK--QLILPQLGAPG-----IAAHRVKKLSGFKVVYGPVDSSDLPEFIA-SGLEATPEMRTKTFTLRERAAVIPVELVSASTTA-----LYIIPVLLILS-AFGGPY---------------GYWTNITHYGLAASAGLVAAIIAGTVLFPLLLPW-LPGRAFSLKG--------------------------------------------------------FAIGIATSLVFIALKATITG----EWPNTLEAGAWILLITVVVSYLGMNFTGCSTYTSLSGVKKEMKWAVPFQIAGIVAGIALWVSSGFLA----------------------------
>Desulfobacula_phenolica_DSM3384_WP092232717
-----MKTS----GECDCNEQPFQKS-LNISSFGVHIMSSMEVVTSACSSEMSNP--EKNHEKPGFKLCSYVYKFIQTDAGP-------------------IPIIKSRLGKKDLFSTFYVRCG-INRHKYTVSPGLYGIGNP-DKHSEVLVTANFKLTFDHLRQKLPGI-------------------------NAWILVLNTNGINVWCAAGKGTFSTRELANKIKDASLEKIVDHK--RIIVPQLGAIG-----VSARDVKKLSGFRVVYGPVRANDISAFLK-NNKKAEKKMRQVTFTLYERFILTPVEVQMILKP------ALITALVLFILSGFGP---------------GIFSLSGAVERGAFCVAALLTGIISGAFITPVLLPF-IPFRHFALKG--------------------------------------------------------IITGSLSALLLLMFTASAFNG-------TTGLSALFLFIVTVSSYLAMNFTGATPFTSPSGVEKEMKLFIPVQLAILVIASGLWIFSAF------------------------------
>Desulfuromonas_soudanensis_ALC17221
-------MPAAPDVEAATGEG-----AEVSFPPP--------------------PSPTNRGEHPGVQLWSFVTGWIETGAGP-------------------VPQVATRLEKRDIFGRWQMRWG-LGRTRYRITPGLYAVGRP-DSDAPVLVTANYKLTFDTLRRELQGQ-------------------------NLWILVLETYGINVWCAAGKGTFGTEEVVRRIRAARLEQVVRHR--TLILPQLGAPG-----VAAHEVQRESGFRVLYGPVRASDLKAFLA-ADGVATAQMRRVTFTTLERLVLTPVELTGMLKT------ALWVSAILLVLGGIGP---------------GVFTLGGVFTRGVAAVLALFAALLTGAVLTPVALPW-IPGRAFALKG--------------------------------------------------------GIAGAAVATVVLLALPGKISL-------LE-GGALLLGLSAAASYCAMNFTGSSTFTSPSGVEKEMRRAIPLQGTALLLAAIFWIAAAF------------------------------
>Desulfonatronum_thiosulfatophilum_SDB24809
-----------------------------------------------------------------------MDGFIPTPSGR-------------------VPRVRSSPTFRDRLGDCRARLG-LCRNTYTVNPGLYAVGTP-TPDTPVVVTANYKLTFDTVRQALSGR-------------------------DAWLLVVDTRGINVWCAGGKGSFCAEAVTLQVRKAGLDHVVSHR--RLILPQLAANG-----VRP---------SGTFARPRAS-RPCWVR-SGP------------------------------------------------------------------------RTCPASWITARTRP--------------------------------------------------------------------------------------------------------------------------------------CGKSPFPSWNGLQ--------------------------------------------------------
>Clostridium_litorale_DSM5388_KDR96580
-----------------------------------------------------MPPLQCLDVFDESEYANMFDGEVSTCEGP-------------------VKRLRTILSSKDRLGSLLVRLG-INRKSYKFPPGLYAIGNP-DENSPALVTANYKLTVDTVRSNIGGI-------------------------DSWLLVINTSGVNVWCAAGKGSFGSDEIIYRIKATGLYKISKSK--LLVLPQLGAPG-----VNPQKISKYTRFKTIYGPVRAGDIKSFFE-NEFKASAGMRRVTFSLSERMILSPVEVMLSAKY------MLAFLFMFTLLNYVDNSTLG---------------LTEYINNVWLNTSAYVFAILTACILFPALLPV-LPFRSFSAKG--------------------------------------------------------GVLGSLYSAAALSFPGAFMYSG-----SMLSNIGHFMCMTCVIGFFSLNFTGSTNFTSLSGVQKETLWSAPVFAICFITGIMCLFIERLV-----------------------------
>Clostridium_litorale_DSM5388_WP161694518
-----------------------------------------------------------------------------------------------------------------------MRLG-INRKSYKFPPGLYAIGNP-DENSPALVTANYKLTVDTVRSNIGGI-------------------------DSWLLVINTSGVNVWCAAGKGSFGSDEIIYRIKATGLYKISKSK--LLVLPQLGAPG-----VNPQKISKYTRFKTIYGPVRAGDIKSFFE-NEFKASAGMRRVTFSLSERMILSPVEVMLSAKY------MLAFLFMFTLLNYVDNSTLG---------------LTEYINNVWLNTSAYVFAILTACILFPALLPV-LPFRSFSAKG--------------------------------------------------------GVLGSLYSAAALSFPGAFMYSG-----SMLSNIGHFMCMTCVIGFFSLNFTGSTNFTSLSGVQKETLWSAPVFAICFITGIMCLFIERLV-----------------------------
>Clostridium_litorale_DSM5388_WP159434243
-----------------------------------------------------------MDVFDESEYANMFDGEVSTCEGP-------------------VKRLRTILSSKDRLGSLLVRLG-INRKSYKFPPGLYAIGNP-DENSPALVTANYKLTVDTVRSNIGGI-------------------------DSWLLVINTSGVNVWCAAGKGSFGSDEIIYRIKATGLYKISKSK--LLVLPQLGAPG-----VNPQKISKYTRFKTIYGPVRAGDIKSFFE-NEFKASAGMRRVTFSLSERMILSPVEVMLSAKY------MLAFLFMFTLLNYVDNSTLG---------------LTEYINNVWLNTSAYVFAILTACILFPALLPV-LPFRSFSAKG--------------------------------------------------------GVLGSLYSAAALSFPGAFMYSG-----SMLSNIGHFMCMTCVIGFFSLNFTGSTNFTSLSGVQKETLWSAPVFAICFITGIMCLFIERLV-----------------------------
>Clostridium_tunisiense_TJ_WP017416929
----------------------------------------------------MIKSGQDVNEEFYRDITPITAEYLDTPIGS-------------------ISSISSELLYKDKLEHFGVMWG-YKRNNYMIKPGIYAIGNP-KPSSPVIVSCNYKLTFDILRKDLKNV-------------------------DCWLLILETNGVNVWCASGKGTFGTEELIRRIRKVKLESLVNHR--VLILPQLGASG-----VDVSKLKKETGFRGMFGPIRSEDIEDYIK-NKFKASKEMRNVKFTISDRAKLTPLSFVQNIKY------YFVALVIILLMNAIRGAVSFG--------------IGELIKITIIQSIPMLLATVVAAMIFPIVLPV-IPFKSFALKG--------------------------------------------------------FVLSLVFLGILSSMSYNFMIQN------NMYFLGYSLITVALVTNICLNFTGSTTYTSFSGVVKETLWALPACIAFAIIGAILMIISLVQGRVV-------------------------
>Anaerocolumna_jejuensis_DSM15929_SHK87540
------MEQNEYQTNSRCACSSGCCGNTQSPPVPKAP----------------------------------YITGLHTTTAG------------------AIPQVATKLSARDIIGTWKVRWG-IGRMNYKISPGLYSVGKP-DDNSPVLVTANYKLTFDCLRKELTSL-------------------------HLWILVLDTKGVNVWCAAGKGTFGTDELVRRISAVRLSEIVRHR--TLILPQLGATG-----IAAHEVAKKSGFQVIYGPVRAEDIKEFLN-AGMKATQEMREVQFTFTDRIVLTPVDFIQWMKP------LLVFYGIFFILNISG---------------------LGHFG--ITELFAVLGSVIAGCILTPAFLPW-IPGRAFAFKG--------------------------------------------------------ALMGLIWTVVLILLTGGAS------QTGILKTLSYLLVLPSVSAYTAMNFTGSSTYTSPSGVNKEMRIAIPIMFLTFICGMILFILSNVLK----TIL---------------------
>Anaerocolumna_xylanovorans_DSM12503_SHO54149
------MEQNESQTNNECSCSSGCCGETQSQPIPKAP----------------------------------YIKGLNVTMAG------------------VVPRVATELSARDILGAWKVRWG-IGRMNYKVSPGLYSVGKP-DENSPVLVTANYKLTFDSLRKELTDL-------------------------NLWILVLDTKGVNVWCAAGKGTFGTDELIRRVSVVRLSEVVRHR--TLILPQLGATG-----IAAHKVAKGSGFHVVYGPVQAQDIKEFLD-AGMKATQEMREVQFTFADRVVLTPVDFVQWMKP------LLIFFGVLFILNALG---------------------LGRFG--ATALLAFLGSVVVGCVLTPTLLPW-IPGRAFAFKG--------------------------------------------------------AFAGLLWAAAVILFVGNAS------LTGVLESLSYLLLLPSISSYTAMNFTGSSTYTSPSGVNKEMQIAIPIMLLATVCGMIFFVISNVIK----TIL---------------------
>Ruminiclostridium_cellobioparum_subsp_termitidis_CT1112_WP004626173
---MENKSCCTSGNARLNTGDRKSVKIRPRLKAANKNCTGVSGQKDNTCCCGGSDNCSSEPVTNYDRNIPWITGEIETAAG-------------------KIPQVATRLLRSDILGAWKVRWG-IGRMNYKINPGVYAVGIP-DRASPVLVTANYKLTFDALRKELSGM-------------------------NVWILVLDTKGINVWCAAGKGTFGTRELVNRISRARLREIVEHK--TLILPQLGAPG-----VSAHEVTKQTGFKVVYGTVRAKDIRSFIN-SEMKATEEMRQVRFTVYDRLVLTPMELVGTFKI------SMLIFGILFLINLVA---------------------RKPFG--VMDFCAYAGAVAAGCVITPILLPW-IPGRAFAWKG--------------------------------------------------------WQAGLLWAIALNFLNGWIG----PEGLSLLRGVGYLLVLPSISAYYAMNFTGSSTYTSFSGVLKEMRLAIPAIILSLIPGIGLLLADSLIRF---------------------------
>Dehalococcoidia_bacterium_SCGC_AG_205_B13_Ga0157251
-----------------------------------------------------------------------------------------------------VRTINTLAGYLSDVLETALRLL-----PFPVKTGLRRVGDP-DRQSPVFVTGNFGLTVRRVTRALR-------------------------GIDAYLLVANSRGINVWCAAAGGHFTTDGVVSVLKTSGIGDLVDHR--RLVLPQLGATG-----IERKVLEERTGWRAVFGPVYAEDIPAYLG-NHYRKPERMRTVRFDPAQRLEMAVMWAFPISIIP-------LIPLLIWWR---------------------------------GLALPFLAVVWAMALLIFLGFPW-IPSRAVVSAGHPLPAWTRYLIVFDPRS-QKVLVVWAMLVAGLIAYGRLAADWHWTAIMGWGLASLAVALLMSLDLAGSTPIYKS-------GLHEDRLLRVELDLDRCEGRAICEQVCPRNCYEIDSKLHKAVILHESECVQCGACIVQCPEDALAFVDPTGQRIPPEQIRKYKLNLAGERAVSA
>Dehalococcoidia_bacterium_SCGC_AG_205_I13_Ga0153886
-----------------------------------------------------------------------------------------------------VRTINTLAGYLSDVLQTALRLL-----PFPVKTGLRRVGDP-DQQSPVFVTSNFGLTVRRVTRALR-------------------------GIDAYLLVANSRGINVWCAAAGGHFTTDGVVSVIKTSGIGDLVDHR--RLVLPQLSATG-----IERKVLEERTGWRAVFGPVYAEDIPAYLG-NHYRKPERMRTVRFDPAQRLEMAVMWAFPISIIP-------LIPLLIWWR---------------------------------GLALPFLAVVWAMALLIFVGFPW-IPSRAVVSAGHALPAWTRYLIVFDPRS-QKVLVAWAMLVAGLIAYGRLAADWHWTAIMGWGLASLAVALLMSLDLAGSTPIYKS-------GLHEDRLLRVELDLDRCEGRAICEQVCPRNCYEIDSKLHKAVILHESECVQCGACIVQCPEDALAFVDPTGQRIPPEQIRKYKLNLAGERAVSA
>Kume_St0_500m_final_contigs_gene_568431_gene_4_c
-----------------------------------------------------------------------------------------------------------MINWIKDIYQTLFRFA-----RFPCEPETVTIGNP-DKSSPVLVTCNFDYTVRHLKEYLKKE-----------------------ALDCFLLVVNTKGTNVWCAATEGVFTTDIVLSHLKVYNVGELVNHK--RLILPQLSVAG-----VKRKELKEHG-WEGIYGPVYFTDLKEFLN-NGLTKNKDMQALEYGYWERFKMGLSHAVFCTLVC-------IIPIFLFAS---------------------------------DWWIQGIGLVWYFAFSMQLIEHF-IPFERLLYKG--------------------------------------------------------LALSLPILILTLTSITDP-------VLKTQATLGVIALGGYIG-------------YDAQGHSHLGQNQKSGTIFAGMFAFLALVYGGTLFL*--------------------------
>Kume_St0_800m_final_contigs_gene_424282_gene_3_p
-----------------------------------------------------------------------------------------------------------MIDWIKDIYQTLFRFA-----RFPCEPDTVLIGNP-DKSSPVLVTCNFDYTVRHLKDYLEKE-----------------------QLDCFLLVVNTKGTNVWCAAAEGIFTTDTVLSHLKVYNVGELVNHH--QLILPQLSVAG-----VKRKELKEHG-WEGIYGPVYFADLKEFLN-NGLTKNKDMQALEYGYWERFKMGLSHAVFCTLVC-------IVPIFLFAS---------------------------------DYWIQAIVLVWYFAFCMQLIEHF-IPFTRLLYKG--------------------------------------------------------LVLSLPILALALTSVKDP-------VLKIQVTMGIIALGAYIG-------------YDA------------------------------------------------------------
>Kume_St0_800m_final_contigs_gene_1380379_gene_2_c
-----------------------------------------------------------------------------------------------------------MINWIKDIYQTLFRFA-----RFPCEPETVTIGNP-DKSSPVLVTCNFDYTVRHLKDYLKKE-----------------------ALDCFLLVVNTKGTNVWCAAAEGVFTTDIVLSHLKVYNVGELVNHK--RLILPQLSVAG-----VKRKELKEHG-WEGIYGPVYFTDLKEFLN-NGLTKNKDMQALEYGYWERFKMGLSHAVFCTLVC-------IIPIFLFAS---------------------------------DWWIQGIGLVWYFAFNMQLIEHF-IPFERLLYKG--------------------------------------------------------LALSLPILVLTLTSITDP-------VLKTQATLGVIALGGYIG-------------YDAQGHSHLGQNQKSGAIFAGMFSFLALVYGGTLFL*--------------------------
>Kume_St0_800m_final_contigs_gene_1480338_gene_1_p
-----------------------------------------------------------------------------------------------------------MIGWIKDIYQTLFRFA-----RFPCEPETIAIGSP-DKSSPILVTCNFDYTVRHLKEYLKKE-----------------------ALDCFLLVVNTKGTNVWCAAAEGVFTTDTVLSHLKVYNVGELVNHK--RLILPQLSVAG-----VKRKELKEHG-WEGIYSPVYITDLKEFLN-NGLTKNKDMQALEYDYWERFEIGLSHAVFCTLIC-------IIPIFLFTS---------------------------------DWWIQGIGLVWYFA---------------------------------------------------------------------------------------------------------------------------------------------------------------------------------------------------
>Kume_St1_500m_final_contigs_gene_646140_gene_2_c
-----------------------------------------------------------------------------------------------------------MINWIKDIYQTLFRFA-----RFPCEPETVTIGNP-DKSSPVLVTCNFDYTVRHLKEYLKKE-----------------------ALDCFLLVVNTKGTNVWCAAAEGVFTTDIVLSHLKVYNVGELVNHK--RLILPQLSVAG-----VKRKELKEHG-WEGIYGPVYFTDLKEFLN-NGLTKNKDMQALEYGYWERFKMGLSHAVFCTLVC-------IIPIFLFAS---------------------------------DWWIQGIGLVWYFAFSMQLIEHF-IPFERLLYKG--------------------------------------------------------LALSLPILVLTLTSITDP-------VLKTQATLGVIALGGYIG-------------YDAQGHSHLGQNQKSGTIFAGMFAFLALVYGGTLFL*--------------------------
>Kume_St1_800m_final_contigs_gene_127486_gene_2_c
-----------------------------------------------------------------------------------------------------------MIAWVKDIYQTLFRFA-----RFPCEPETVAVGNP-DKSSPVLVTCNFDYTVRHLKKYLEKE-----------------------QLDCFLLVVNTKGTNVWCAAAEGIFTTETVLAHLKVYNVKDLVDHT--RLILPQLSVAG-----IKRKDLKEHG-WEGIYGPVYFTDLKEFLK-NGLTKTKEMQALEYGYWERFKMGLSHAVFCTLVC-------ILPIFLFAS---------------------------------DWWLQAIALVWYFAFSMQLIEHF-IPFHRLLYKG--------------------------------------------------------LALTLPVLAIALFSVTDS-------VLRIQATIGIVALGAYIG-------------YDAQGHSHLGQNQQSGKLFARIFASLALIYGGTLLL*--------------------------
>Kume_St1_800m_final_contigs_gene_783837_gene_1_p
-----------------------------------------------------------------------------------------------------------MINWIKDIYQTLFRFA-----RFPCEPETVTIGNP-DKSSPVLVTCNFDYTVRNLKEYLKKE-----------------------ALDCFLLVVNTKGTNVWCAAAEGVFTTDIVLSHLKVYNVGELVNHK--RLILPQLSVAG-----VKRKELKEHG-WEGIYGPVYFTDLKEFLN-NGLTKNKDMQALEYGYWERFKMGLSHAVFCTLVC-------II---------------------------------------------------------------------------------------------------------------------------------------------------------------------------------------------------------------------------------------------------------
>Kume_St1_800m_final_contigs_gene_783838_gene_1_p
-----------------------------------------------------------------------------------------------------------MIGWIKDIYQTLFRFA-----RFPCEPETIAIGSP-DKSSPILVTCNFDYTVRHLKEYLKKE-----------------------ALDCFLLVVNTKGTNVWCAAAEGVFTTDTVLSHLKVYNVGELVNHK--RLILPQLSVAG-----VKRKELKEHG-WKGIYGPVYFTDLKEFLN-NGLTKNKDMQALEYGYWERFKMGLSHAVFCTLVC-------II---------------------------------------------------------------------------------------------------------------------------------------------------------------------------------------------------------------------------------------------------------
